# Supplementary material for: Transcriptomic characterization of cancer-testis antigens identifies MAGEA3 as a driver of tumor progression in hepatocellular carcinoma
Source: PLoS Genet. 2021 Jun 24;17(6):e1009589. doi: 10.1371/journal.pgen.1009589 (PMC8224860; doi:10.1371/journal.pgen.1009589)
Supplement: S6 Table — (XLSX) [file pgen.1009589.s009.xlsx]

## Sheet: Supplementary_Table_5
Supplementary Table 6- Differentially expressed genes between sh8375 treated PLC5 cells and SCR treated PLC5 cells
Gene	baseMean	log2FoldChange	lfcSE	stat	pvalue	padj
DDX11L1	8.79181	-0.647392	0.572151	-1.13151	0.257842	0.387638
WASH7P	1871.67	0.0851558	0.165161	0.515594	0.606138	0.722203
MIR6859-3	159.758	-0.136248	0.273544	-0.498085	0.618424	0.731394
MIR6859-2	159.758	-0.136248	0.273544	-0.498085	0.618424	0.731394
MIR6859-4	159.758	-0.136248	0.273544	-0.498085	0.618424	0.731394
MIR6859-1	159.758	-0.136248	0.273544	-0.498085	0.618424	0.731394
MIR1302-11	0.313309	0	0.341218	0	1	NA
MIR1302-9	0.313309	0	0.341218	0	1	NA
MIR1302-2	0.313309	0	0.341218	0	1	NA
MIR1302-10	0.313309	0	0.341218	0	1	NA
FAM138A	0.410501	-0.454727	0.383377	-1.18611	0.235579	NA
FAM138F	0.410501	-0.454727	0.383377	-1.18611	0.235579	NA
OR4F5	0	NA	NA	NA	NA	NA
MAGEA6	2619.97	-5.47896	0.164722	-33.2618	1.38e-242	1.37e-238
LOC100133331	1906.9	-0.12612	0.172258	-0.732159	0.464071	0.598697
LOC100132287	791.768	-0.20434	0.199226	-1.02567	0.305048	0.439089
LOC100132062	791.768	-0.20434	0.199226	-1.02567	0.305048	0.439089
OR4F3	0.114727	0.249609	0.305061	0.818226	0.413228	NA
OR4F29	0.114727	0.249609	0.305061	0.818226	0.413228	NA
OR4F16	0.114727	0.249609	0.305061	0.818226	0.413228	NA
LOC101928626	0	NA	NA	NA	NA	NA
MIR6723	10273.7	-0.0586614	0.242814	-0.24159	0.809098	0.875322
LOC100288069	420.954	0.173074	0.449408	0.385117	0.700151	0.79686
FAM87B	7.09453	-0.878807	0.578854	-1.51819	0.128968	0.225886
LINC00115	78.6981	-0.124833	0.275883	-0.452484	0.650921	0.757496
MAGEA3	4017.7	-5.4295	0.1447	-37.5223	0	0
FAM41C	16.7923	0.709461	0.493943	1.43632	0.150911	0.255322
CPLX2	83.5995	-5.09165	0.425674	-11.9614	5.66e-33	4.68e-31
GAPLINC	125.603	-4.77547	0.364036	-13.1181	2.59e-39	3.54e-37
SLC14A1	31.3584	-4.74885	0.485991	-9.77147	1.49e-22	6.07e-21
KLHL17	2630.71	0.12462	0.228519	0.545339	0.58552	0.704873
AKR1B10	288.361	-4.73355	0.277429	-17.0622	2.84e-65	1.26e-62
ACSL6	130.765	-4.53208	0.308815	-14.6757	9.22e-49	2.24e-46
CRH	32382.3	-4.49233	0.419141	-10.718	8.38e-27	4.6e-25
ISG15	4459.37	-0.154264	0.226111	-0.68225	0.495081	0.626975
MAGEA9B	157.369	-4.39609	0.308102	-14.2683	3.45e-46	6.74e-44
MAGEA9	157.369	-4.39609	0.308102	-14.2683	3.45e-46	6.74e-44
GPR3	188.956	-4.26973	0.299795	-14.2422	5.01e-46	9.7e-44
LINC01342	0.90482	-0.519002	0.459874	-1.12858	0.259077	NA
MIR200B	0.512208	0	0.40793	0	1	NA
MIR200A	0.229455	0.331132	0.337605	0.980827	0.326678	NA
MIR429	0.87044	0.729184	0.535314	1.36216	0.173147	NA
TTLL10	0.297258	-0.361833	0.348463	-1.03837	0.299099	NA
TNFRSF18	3.48597	0.0288371	0.62925	0.0458277	0.963448	0.977224
TNFRSF4	1.73186	-0.00338177	0.594299	-0.00569036	0.99546	0.998214
DBNDD1	1250.84	-4.11154	0.158363	-25.9628	1.3e-148	2.89e-145
B3GALT6	2998.75	0.215641	0.143907	1.49848	0.134008	0.232812
FAM132A	45.3257	0.295728	0.371508	0.796019	0.426021	0.562944
UBE2J2	6906.47	-0.102901	0.152066	-0.676687	0.498604	0.630116
SCNN1D	369.782	0.181063	0.272411	0.664669	0.506262	0.637449
ACAP3	4709.76	-0.170507	0.22618	-0.753855	0.450937	0.586191
MIR6726	7.48584	-0.190079	0.581163	-0.327067	0.743617	0.828695
P3H3	338.171	-4.0639	0.324119	-12.5383	4.61e-36	4.57e-34
MAGEA12	2296.06	-4.03632	0.137372	-29.3824	9.23e-190	4.6e-186
MIR6727	58.2312	0.101133	0.323807	0.312326	0.754793	0.836454
MAGEA2B	4155.01	-3.99419	0.12351	-32.339	1.98e-229	1.32e-225
TAS1R3	58.0773	0.733372	0.390138	1.87978	0.0601383	0.121204
CHRNB2	99.6861	-3.95322	0.367051	-10.7702	4.76e-27	2.66e-25
MIR6808	31.2126	-0.433392	0.383238	-1.13087	0.25811	0.387924
SEC11A	6077	-3.90377	0.161933	-24.1074	2.09e-128	4.17e-125
AURKAIP1	8098.25	-0.199588	0.186205	-1.07187	0.283778	0.416606
ZNF747	104.915	-3.88808	0.344549	-11.2845	1.56e-29	1.03e-27
DESI2	5478.23	-3.83361	0.137005	-27.9815	2.73e-172	9.07e-169
MAGEA2	4524.82	-3.81534	0.131587	-28.9949	7.64e-185	3.04e-181
ANKRD65	4.78233	-0.437742	0.629049	-0.695879	0.486505	0.619261
TMEM88B	0.529764	0.165524	0.435462	0.380111	0.703863	NA
MAGEA1	43.8569	-3.79366	0.432479	-8.77189	1.76e-18	5.08e-17
VWA1	7436.3	-0.195039	0.138025	-1.41307	0.157635	0.264226
ATAD3C	286.224	0.104448	0.231895	0.450409	0.652415	0.758424
ATAD3B	11411.1	-0.102691	0.184041	-0.55798	0.576858	0.697606
ATAD3A	6497	-0.0341381	0.134975	-0.252922	0.800328	0.869555
TMEM240	8.74203	0.233053	0.583775	0.399218	0.689733	0.789148
SSU72	8095.67	0.120175	0.155665	0.772011	0.440108	0.576817
CLDN2	507.235	-3.75616	0.229269	-16.3832	2.52e-60	9.14e-58
MIB2	3385.5	0.229216	0.23824	0.96212	0.335989	0.472647
MMP23B	28.7445	0.649531	0.400284	1.62268	0.104659	0.191012
DLGAP1	257.109	-3.73088	0.276995	-13.4691	2.38e-41	3.73e-39
CDK11B	10585.3	0.222829	0.115542	1.92856	0.0537853	0.110543
SLC35E2B	4747.52	-0.243443	0.185439	-1.31279	0.189253	0.305712
CDK11A	7889.32	0.126086	0.121647	1.03649	0.299974	0.434179
SLC35E2	1662.51	-0.114682	0.152008	-0.754445	0.450582	0.585919
ETV4	5698.87	-3.70085	0.369053	-10.0279	1.15e-23	5.08e-22
GNB1	35874	0.249059	0.138527	1.79791	0.0721918	0.14108
CALML6	65.2468	-0.712641	0.380643	-1.87221	0.0611782	0.122899
ITGB1	97083.3	-3.61589	0.136031	-26.5815	1.11e-155	3.17e-152
CFAP74	3.17332	-0.425668	0.636674	-0.668581	0.503763	0.634663
LRAT	14.2543	-3.61333	0.564576	-6.40007	1.55e-10	1.74e-09
DHRS2	410.969	-3.60521	0.227126	-15.8731	9.73e-57	3.13e-54
FAAP20	5032.71	-0.226126	0.189527	-1.1931	0.232829	0.358498
BSG	27435.9	-3.5753	0.136965	-26.1037	3.31e-150	8.24e-147
MORN1	471.715	0.0966476	0.207176	0.466499	0.640858	0.74936
LOC100129534	92.69	-0.0827625	0.265467	-0.311761	0.755222	0.836651
RER1	11117.8	0.0825373	0.145542	0.567105	0.570643	0.6924
WIF1	20.489	-3.56512	0.508761	-7.00746	2.43e-12	3.44e-11
PLCH2	11.3339	-0.559639	0.538882	-1.03852	0.299029	0.433244
REEP2	469.132	-3.5272	0.244652	-14.4172	4.03e-47	8.64e-45
HES5	0.45594	0.00149809	0.375962	0.00398468	0.996821	NA
LOC115110	54.4159	0.0159961	0.289892	0.0551797	0.955995	0.972884
TNFRSF14	175.791	-0.238705	0.180759	-1.32057	0.186646	0.302654
LOC100996583	2.18017	0.693397	0.626835	1.10619	0.268646	0.400437
CHRDL1	11.0376	-3.49805	0.601628	-5.8143	6.09e-09	5.5e-08
ZNF618	1148.64	-3.49666	0.2329	-15.0136	5.98e-51	1.61e-48
TTC34	6.11453	-0.781198	0.627861	-1.24422	0.213418	0.335531
ACTRT2	0	NA	NA	NA	NA	NA
LINC00982	0	NA	NA	NA	NA	NA
PRDM16	3.55715	-0.857257	0.636943	-1.34589	0.178337	0.291858
MIR4251	0	NA	NA	NA	NA	NA
PRDM13	55.3328	-3.48675	0.433862	-8.03654	9.24e-16	1.97e-14
HGF	994.939	-3.43939	0.218351	-15.7517	6.69e-56	2.08e-53
MIR551A	0	NA	NA	NA	NA	NA
CEMIP	2960.61	-3.41489	0.202665	-16.8499	1.05e-63	4.37e-61
WRAP73	2163.36	-0.119391	0.124896	-0.955923	0.339111	0.476042
ABHD14A	506.331	-3.40171	0.197596	-17.2155	2.03e-66	9.42e-64
ELAVL3	143.585	-3.40164	0.370642	-9.1777	4.4e-20	1.48e-18
CCDC27	4.80006	-0.591912	0.63431	-0.933158	0.350738	0.488295
AEBP1	61.7017	-3.39696	0.395521	-8.58857	8.81e-18	2.34e-16
LRRC47	8390.58	-0.0128488	0.1315	-0.0977094	0.922163	0.952015
ICMT	8535.25	-3.37254	0.150383	-22.4263	2.18e-111	3.35e-108
DFFB	986.928	-0.0552762	0.167085	-0.330826	0.740776	0.826901
CGA	6156.01	-3.35609	0.54621	-6.14432	8.03e-10	8.24e-09
KCNH2	102.576	-3.35275	0.299941	-11.178	5.22e-29	3.36e-27
LINC01346	0	NA	NA	NA	NA	NA
LOC284661	0	NA	NA	NA	NA	NA
TCL1B	600.678	-3.33059	0.492641	-6.76067	1.37e-11	1.77e-10
MIR4417	0	NA	NA	NA	NA	NA
MIR4689	0	NA	NA	NA	NA	NA
NPHP4	1220.69	0.142816	0.148127	0.964147	0.334972	0.471383
C1orf64	43.825	-3.32945	0.426459	-7.80719	5.85e-15	1.12e-13
CHD5	182.909	0.245981	0.4913	0.500674	0.616601	0.730249
RPL22	29220.9	-0.177853	0.182559	-0.974226	0.329944	0.466316
LOC102724450	57.9397	0.200437	0.316092	0.634108	0.52601	0.654255
RNF207	2187.67	-0.200454	0.221789	-0.903807	0.366098	0.504359
PPP2R2C	523.007	-3.31396	0.175904	-18.8396	3.58e-79	2.55e-76
TCL1A	26.0902	-3.30528	0.517049	-6.39258	1.63e-10	1.83e-09
LHFPL4	30.4402	-3.2644	0.513813	-6.35328	2.11e-10	2.34e-09
ABT1	2852.43	-3.24119	0.154782	-20.9403	2.3e-97	3.05e-94
PADI3	14.7909	-3.2363	0.561123	-5.76755	8.04e-09	7.11e-08
TCL6	140.772	-3.22906	0.377474	-8.5544	1.18e-17	3.11e-16
G6PC	4985.28	-3.19801	0.260791	-12.2627	1.44e-34	1.33e-32
MIR4252	0	NA	NA	NA	NA	NA
PACSIN1	17.4791	-3.19038	0.503013	-6.34255	2.26e-10	2.49e-09
PRKCB	10.1872	-3.17624	0.603114	-5.2664	1.39e-07	1.02e-06
SLC16A2	2686.78	-3.165	0.171919	-18.4098	1.1e-75	6.82e-73
TAS1R1	21.5726	-0.717104	0.458199	-1.56505	0.117571	0.209553
ZBTB48	2284.54	0.202118	0.121811	1.65928	0.0970597	0.179545
LYNX1	97.842	-3.16322	0.286574	-11.0381	2.5e-28	1.53e-26
CCDC92	749.391	-3.15388	0.186065	-16.9504	1.91e-64	8.28e-62
THAP3	4259.87	0.206835	0.16929	1.22178	0.22179	0.345433
DNAJC11	6258.84	0.161253	0.129184	1.24825	0.211941	0.333714
LOC100505887	0	NA	NA	NA	NA	NA
PNPLA5	17.0632	-3.15281	0.520527	-6.05697	1.39e-09	1.38e-08
VAMP3	15660.1	0.130808	0.1337	0.978367	0.327893	0.46414
LINC01018	48.6625	-3.13868	0.377016	-8.32506	8.43e-17	2.05e-15
UTS2	0.378575	-0.426295	0.373101	-1.14257	0.253216	NA
TUBA3C	7.28568	-3.13048	0.612076	-5.11454	3.15e-07	2.17e-06
MYO1G	32.9632	-3.12332	0.421696	-7.40658	1.3e-13	2.15e-12
ERRFI1	20838.9	0.0445261	0.156507	0.284498	0.776029	0.852063
LOC102724539	0.114727	0.249609	0.305061	0.818226	0.413228	NA
SLC45A1	4.3378	0.022074	0.630367	0.0350178	0.972066	0.983413
RERE	10954	-0.137863	0.193347	-0.713031	0.475826	0.609679
LOC102724552	1.52541	-0.279581	0.572829	-0.488072	0.625499	0.736586
C1orf115	2957.16	-3.11664	0.15338	-20.3198	8.59e-92	9.02e-89
MIR6728	357.797	-0.19054	0.179246	-1.063	0.287781	0.421179
ENO1-AS1	79.5075	-0.329071	0.323081	-1.01854	0.30842	0.442962
CA6	0.308027	0.368038	0.351069	1.04834	0.294484	NA
SLC2A7	9.33223	0.561307	0.520753	1.07788	0.281089	0.413634
SLC2A5	13.5637	-0.234537	0.513121	-0.457079	0.647614	0.755
SUMO3	3277.67	-3.11654	0.160403	-19.4294	4.35e-84	3.61e-81
MIR34A	0.514952	0.369044	0.465471	0.792841	0.427871	NA
HSD11B2	200.042	-3.1154	0.313641	-9.93303	2.99e-23	1.27e-21
KIAA0040	265.412	-3.1057	0.225919	-13.747	5.31e-43	8.75e-41
LOC100506022	17.9256	0.374273	0.499151	0.74982	0.453363	0.588577
SLC25A33	3892.13	0.229303	0.182677	1.25524	0.209393	0.330662
FAM163A	27.7884	-3.09521	0.483352	-6.40364	1.52e-10	1.71e-09
FSTL4	1556.38	-3.09499	0.183214	-16.8928	5.08e-64	2.16e-61
PIK3CD-AS1	0	NA	NA	NA	NA	NA
ALOX12B	52.2996	-3.09077	0.360108	-8.5829	9.25e-18	2.45e-16
CLSTN1	15422.1	-0.21378	0.116617	-1.83318	0.0667751	0.13221
CTNNBIP1	1987.44	-0.156115	0.126775	-1.23144	0.218159	0.341208
TMEM179	53.7288	-3.08156	0.373527	-8.24991	1.59e-16	3.73e-15
VWF	15.801	-3.07955	0.561303	-5.48643	4.1e-08	3.25e-07
MIR5697	0.576532	-0.276554	0.505608	-0.546973	0.584398	NA
RSPO4	7.20644	-3.07524	0.618497	-4.97213	6.62e-07	4.32e-06
RFK	5670.7	-3.05709	0.131449	-23.2569	1.21e-119	2.19e-116
KIF1B	10936.8	0.281091	0.199342	1.41009	0.158512	0.265434
MRPL3	7133.2	-3.04429	0.154949	-19.647	6.13e-86	5.82e-83
BOLA3	2264.22	-3.02899	0.172444	-17.5651	4.56e-69	2.33e-66
APITD1-CORT	1746.84	0.134195	0.155238	0.864443	0.387345	0.525637
APITD1	1926.25	0.0866592	0.170387	0.508601	0.611032	0.725291
CORT	107.288	0.0628344	0.253918	0.247459	0.804553	0.872631
ZMAT5	982.183	-3.02803	0.160134	-18.9093	9.55e-80	7.05e-77
METTL9	4878.71	-3.01454	0.153921	-19.585	2.08e-85	1.88e-82
ARPC1A	10613.3	-2.99597	0.15796	-18.9667	3.22e-80	2.47e-77
C1orf127	5.97243	-0.612094	0.60075	-1.01888	0.308258	0.442857
TARDBP	16329.3	-0.196798	0.134516	-1.46302	0.143463	0.245009
CLN6	4472.51	-2.98387	0.137729	-21.6648	4.41e-104	6.28e-101
BAIAP2-AS1	1005.45	-2.96731	0.169892	-17.4658	2.61e-68	1.3e-65
EXOSC10	7735.68	0.13911	0.159758	0.870756	0.383887	0.521976
MTOR	10342.2	0.171874	0.195024	0.881293	0.378159	0.51664
MTOR-AS1	208.802	0.218449	0.308083	0.70906	0.478287	0.611804
ANGPTL7	1.59912	0.403887	0.581705	0.694316	0.487484	0.620152
PXYLP1	195.172	-2.95105	0.269776	-10.9389	7.51e-28	4.46e-26
PTCHD2	4.82172	-0.018326	0.630497	-0.0290659	0.976812	0.986499
SEC14L4	11.3539	-2.93651	0.564632	-5.20075	1.98e-07	1.41e-06
FBXO2	5341.7	0.00643257	0.252914	0.0254338	0.979709	0.988255
FBXO44	4192.11	-0.274967	0.181687	-1.51341	0.130175	0.227561
SLC17A4	7.8394	-2.93342	0.604772	-4.85045	1.23e-06	7.65e-06
MAD2L2	3184.14	-0.161275	0.161893	-0.996188	0.319159	0.45397
DRAXIN	5.15954	0.706279	0.626213	1.12786	0.25938	0.389304
SLC1A3	92.1569	-2.92201	0.268514	-10.8822	1.4e-27	8.08e-26
C1orf167	751.656	-0.163834	0.179803	-0.911186	0.362197	0.500507
LOC102724659	1.24622	-0.369871	0.5643	-0.65545	0.512178	0.642341
MTHFR	3963.24	-0.179976	0.168519	-1.06799	0.285526	0.418464
STMN3	102.168	-2.90912	0.280516	-10.3706	3.37e-25	1.68e-23
TMEM30B	7040.21	-2.90896	0.178896	-16.2606	1.88e-59	6.69e-57
PCYT1B	11.5198	-2.89914	0.570684	-5.08011	3.77e-07	2.57e-06
NPPB	55.8263	0.149728	0.618217	0.242193	0.80863	0.875149
KIAA2013	10242.1	-0.0667433	0.135711	-0.491804	0.622858	0.734621
GPRIN1	903.54	-2.89201	0.173441	-16.6744	2.01e-62	7.87e-60
MFN2	15562.7	-0.273204	0.143766	-1.90033	0.0573895	0.116711
MLNR	24.6826	-2.89086	0.453512	-6.37439	1.84e-10	2.05e-09
MIR6729	61.5921	0.244466	0.37581	0.650504	0.515367	0.64492
PTGER4	36.0055	-2.88826	0.396903	-7.27701	3.41e-13	5.37e-12
MIR7846	0	NA	NA	NA	NA	NA
ZNF664	14843.4	-2.88373	0.156672	-18.4061	1.17e-75	7.09e-73
MIR4632	0.428016	0.279566	0.410986	0.680233	0.496357	NA
PCDHGC3	44.973	-2.88132	0.390437	-7.37972	1.59e-13	2.6e-12
SNORA59B	25.2981	0.0386701	0.452631	0.0854341	0.931916	0.958288
SNORA59A	25.2981	0.0386701	0.452631	0.0854341	0.931916	0.958288
LVRN	110.421	-2.858	0.271185	-10.5389	5.71e-26	3e-24
MIR6730	11.8166	0.271782	0.508532	0.534444	0.593034	0.71147
AADACL4	0	NA	NA	NA	NA	NA
AADACL3	0.229455	0.331132	0.337605	0.980827	0.326678	NA
C1orf158	0	NA	NA	NA	NA	NA
PRAMEF12	0	NA	NA	NA	NA	NA
PRAMEF1	0	NA	NA	NA	NA	NA
PRAMEF11	0.229455	0.331132	0.337605	0.980827	0.326678	NA
HNRNPCL4	12.1361	0.574216	0.575024	0.998595	0.317991	0.452825
HNRNPCL3	12.1361	0.574216	0.575024	0.998595	0.317991	0.452825
HNRNPCL1	12.1361	0.574216	0.575024	0.998595	0.317991	0.452825
PRAMEF2	0	NA	NA	NA	NA	NA
PRAMEF4	0.251442	0	0.335132	0	1	NA
PRAMEF8	0	NA	NA	NA	NA	NA
PRAMEF7	0	NA	NA	NA	NA	NA
PRAMEF6	0.229455	0.331132	0.337605	0.980827	0.326678	NA
PRAMEF9	0.229455	0.331132	0.337605	0.980827	0.326678	NA
LOC101929983	0.229455	0.331132	0.337605	0.980827	0.326678	NA
LOC391003	0	NA	NA	NA	NA	NA
PRAMEF22	0	NA	NA	NA	NA	NA
PRAMEF25	0	NA	NA	NA	NA	NA
PRAMEF26	0	NA	NA	NA	NA	NA
PRAMEF5	0	NA	NA	NA	NA	NA
LOC649324	0	NA	NA	NA	NA	NA
LOC645354	0	NA	NA	NA	NA	NA
HNRNPCL2	5.70741	0.34107	0.612978	0.556415	0.577927	0.698682
PRAMEF10	0	NA	NA	NA	NA	NA
LOC645382	0	NA	NA	NA	NA	NA
PRAMEF15	0	NA	NA	NA	NA	NA
LOC400736	0	NA	NA	NA	NA	NA
PRAMEF14	0	NA	NA	NA	NA	NA
PRAMEF19	0	NA	NA	NA	NA	NA
PRAMEF16	0	NA	NA	NA	NA	NA
PRAMEF17	0	NA	NA	NA	NA	NA
PRAMEF20	0	NA	NA	NA	NA	NA
LRRC38	0	NA	NA	NA	NA	NA
PDPN	0	NA	NA	NA	NA	NA
CRP	128.755	-2.85797	0.352513	-8.10742	5.17e-16	1.14e-14
CYP2B6	578.571	-2.85576	0.198831	-14.3628	8.86e-47	1.82e-44
TMEM51-AS1	105.062	-0.288686	0.238292	-1.21148	0.225713	0.35
LRRC10B	13.6409	-2.84704	0.562169	-5.06439	4.1e-07	2.78e-06
C1orf195	0.485104	0.121246	0.420037	0.288655	0.772846	NA
SLC26A4	10.4485	-2.84571	0.590396	-4.82	1.44e-06	8.82e-06
EFHD2	4689.1	-0.154763	0.148047	-1.04536	0.295856	0.4299
CTRC	0.809692	-0.304513	0.442329	-0.688431	0.491182	NA
CELA2A	0.600164	-0.112908	0.411874	-0.274131	0.783984	NA
CELA2B	35.1326	-0.602565	0.359762	-1.6749	0.0939543	0.175215
CASP9	5269.47	0.132044	0.152369	0.866609	0.386156	0.524417
SIGLEC15	4.26164	-2.83636	0.634623	-4.46937	7.84e-06	4.21e-05
H2BFWT	14.0374	-2.83181	0.554126	-5.1104	3.21e-07	2.21e-06
DDI2	2811.97	0.0326762	0.247267	0.132149	0.894866	0.934225
RSC1A1	2313.76	-0.030304	0.195867	-0.154718	0.877044	0.922104
VSTM1	41.0522	-2.82996	0.443322	-6.38353	1.73e-10	1.93e-09
PPP1R1B	18.2304	-2.82867	0.544883	-5.19134	2.09e-07	1.48e-06
P2RX5	45.2992	-2.82141	0.384784	-7.33245	2.26e-13	3.64e-12
CABP7	450.762	-2.81053	0.208153	-13.5023	1.52e-41	2.42e-39
UQCRHL	343.529	-0.158363	0.192742	-0.82163	0.411288	0.54878
GJA10	6.39703	-2.8082	0.622555	-4.51077	6.46e-06	3.53e-05
SPEN	6687.66	0.19338	0.365116	0.529641	0.596361	0.714294
MIR5096	0	NA	NA	NA	NA	NA
C8orf49	78.2378	-2.80818	0.288182	-9.74446	1.95e-22	7.89e-21
ANKH	2529.4	-2.78959	0.13667	-20.4111	1.33e-92	1.47e-89
HSPB7	1.23386	-1.0647	0.567683	-1.87552	0.0607217	0.122154
PHLDA2	456.781	-2.789	0.24098	-11.5736	5.61e-31	4.11e-29
CLCNKB	3.07858	-0.826051	0.634182	-1.30255	0.19273	0.310048
FAM131C	429.278	0.190681	0.298449	0.638908	0.522883	0.651503
LEAP2	51.3715	-2.77451	0.44836	-6.18813	6.09e-10	6.35e-09
ARHGEF19	1153.85	-0.151137	0.14954	-1.01068	0.312169	0.446768
ACVR1C	97.3182	-2.76688	0.295049	-9.37768	6.74e-21	2.43e-19
KCNS3	49.7895	-2.75931	0.442737	-6.2324	4.59e-10	4.85e-09
SZRD1	16557.1	0.0841265	0.132484	0.634992	0.525434	0.653831
CLCNKA	6.74206	-2.75894	0.63075	-4.37406	1.22e-05	6.33e-05
LOC105378732	14.23	-2.73909	0.533749	-5.1318	2.87e-07	1.99e-06
CROCCP3	240.886	-0.265827	0.216359	-1.22864	0.219206	0.342442
SLC17A7	348.902	-2.73141	0.21239	-12.8603	7.52e-38	9.15e-36
MIR3675	0.0920078	-0.234211	0.300577	-0.779204	0.43586	NA
HOXA10-HOXA9	18.3351	-2.72901	0.542311	-5.03218	4.85e-07	3.25e-06
CROCCP2	3601.09	-0.231655	0.169186	-1.36924	0.170925	0.282074
HOXA-AS3	17.5505	-2.72759	0.51418	-5.30475	1.13e-07	8.38e-07
FAM231A	0.251294	0.0814093	0.347264	0.23443	0.814651	NA
FAM231C	0.407948	0.0699289	0.387596	0.180417	0.856825	NA
BECN2	12.1076	-2.72457	0.599108	-4.5477	5.42e-06	3e-05
MST1L	2089.57	0.696395	0.40811	1.70639	0.0879357	0.165477
CROCC	2744.15	-0.107019	0.206262	-0.518851	0.603864	0.720516
MFAP2	43.916	-0.464853	0.347477	-1.33779	0.180963	0.295459
ATP2B2	63.7023	-2.72262	0.442261	-6.15614	7.45e-10	7.69e-09
HIST2H2AC	32.0195	-2.72054	0.416586	-6.53054	6.55e-11	7.77e-10
PADI2	114.953	-0.220458	0.33676	-0.654644	0.512697	0.642912
PADI1	66.2657	0.258919	0.301957	0.857469	0.391186	0.52912
CELA3A	14.4002	-2.69715	0.551702	-4.88879	1.01e-06	6.41e-06
MIR3972	0	NA	NA	NA	NA	NA
ADH1A	36.711	-2.69654	0.41751	-6.45863	1.06e-10	1.21e-09
PADI6	0.335696	0.23586	0.352826	0.668488	0.503822	NA
REN	5.3079	-2.69565	0.622589	-4.32974	1.49e-05	7.58e-05
NR4A2	7598.31	-2.69484	0.145836	-18.4785	3.08e-76	1.98e-73
ACTL8	15.8829	0.448223	0.476886	0.939895	0.347271	0.484551
LOC101927876	0	NA	NA	NA	NA	NA
IGSF21	0.487251	-0.224776	0.384463	-0.58465	0.558783	NA
GLIDR	58.0862	-2.67907	0.320369	-8.36244	6.14e-17	1.51e-15
PAX7	0.184016	-0.31672	0.331255	-0.956122	0.339011	NA
TAS1R2	0.184016	-0.31672	0.331255	-0.956122	0.339011	NA
ZBTB8B	35.9528	-2.67605	0.457904	-5.84413	5.09e-09	4.66e-08
MIR4695	2.36103	0.205469	0.605984	0.339066	0.73456	0.822496
MIR1290	1.1618	0.245846	0.495261	0.496398	0.619614	0.732246
UNC45A	11769.2	-2.67333	0.128893	-20.7408	1.49e-95	1.85e-92
UBR4	20723.5	0.242446	0.25846	0.938044	0.348222	0.48561
APOH	3354.88	-2.66908	0.222568	-11.9922	3.9e-33	3.27e-31
MRTO4	8284.55	-0.232424	0.168636	-1.37826	0.168124	0.278499
AKR7L	91.2352	-0.580451	0.335265	-1.73132	0.0833943	0.158412
AKR7A3	43.6614	-0.418381	0.411156	-1.01757	0.308881	0.443433
RASSF5	440.063	-2.66206	0.231487	-11.4998	1.32e-30	9.55e-29
AKR7A2	2974.76	-0.093605	0.145102	-0.645099	0.518863	0.64775
TMEM221	138.611	-2.65973	0.240153	-11.0752	1.66e-28	1.03e-26
LRRC37A6P	427.594	-2.65853	0.291611	-9.1167	7.74e-20	2.56e-18
MINOS1	5865.23	0.285171	0.172563	1.65256	0.0984201	0.18164
MINOS1-NBL1	5750.91	0.0162362	0.201059	0.0807537	0.935638	0.960553
CKMT1B	26.4422	-2.65283	0.518059	-5.12071	3.04e-07	2.1e-06
NBL1	3852.65	-0.177215	0.228784	-0.774594	0.43858	0.575268
GPR162	25.3024	-2.6493	0.437718	-6.05253	1.43e-09	1.41e-08
SLC13A2	22.3235	-2.64827	0.443853	-5.96654	2.42e-09	2.32e-08
RNF186	4.88588	0.638984	0.618698	1.03279	0.301704	0.435765
OTUD3	2037.9	0.0432379	0.213463	0.202555	0.839483	0.896286
PLA2G2E	0	NA	NA	NA	NA	NA
PLA2G2A	0.642925	0.206591	0.418534	0.493606	0.621585	NA
PLA2G5	0.421045	-0.463965	0.3866	-1.20012	0.230094	NA
PLA2G2D	0	NA	NA	NA	NA	NA
PLA2G2F	0	NA	NA	NA	NA	NA
PLA2G2C	0	NA	NA	NA	NA	NA
UBXN10-AS1	0.368031	-0.382002	0.355423	-1.07478	0.282473	NA
UBXN10	9.38993	0.549925	0.561497	0.979392	0.327386	0.463555
VWA5B1	0.184016	-0.31672	0.331255	-0.956122	0.339011	NA
LINC01141	1.16831	0.335619	0.482633	0.695392	0.48681	0.619531
CAMK2N1	8228.97	-0.17636	0.169139	-1.04269	0.29709	0.431232
RXFP4	5.88714	-2.64346	0.617341	-4.28201	1.85e-05	9.24e-05
FAM43B	30.6593	0.215298	0.475971	0.452335	0.651028	0.757521
TMEM248	8067.64	-2.64116	0.11437	-23.093	5.44e-118	9.03e-115
FAR2P2	52.9563	-2.63742	0.360079	-7.32454	2.4e-13	3.84e-12
POM121L2	26.5256	-2.63643	0.462445	-5.70107	1.19e-08	1.02e-07
UGT2B11	554.718	-2.63284	0.211226	-12.4646	1.17e-35	1.13e-33
NIPAL1	131.24	-2.62445	0.315542	-8.31725	9e-17	2.18e-15
TUB	513.725	-2.61923	0.181016	-14.4697	1.88e-47	4.17e-45
GINS1	4031.29	-2.60531	0.1699	-15.3344	4.51e-53	1.26e-50
HP1BP3	17433.2	-0.190089	0.119281	-1.59363	0.11102	0.200348
SOX21	35.1837	-2.59894	0.384267	-6.76338	1.35e-11	1.74e-10
MIR1256	0	NA	NA	NA	NA	NA
LRP8	6378.38	-2.5967	0.20258	-12.8182	1.3e-37	1.52e-35
LOC100506801	14.8567	0.778059	0.506795	1.53526	0.124721	0.219839
NBPF3	1427.46	-0.00507156	0.160738	-0.0315517	0.97483	0.98511
ALPL	21169.7	-0.0779015	0.152798	-0.509833	0.610168	0.724801
RBP1	129.765	-2.58283	0.263903	-9.78704	1.28e-22	5.26e-21
CDC42EP3	15.811	-2.57016	0.530158	-4.84792	1.25e-06	7.74e-06
UNC119B	2960.57	-2.5682	0.149285	-17.2034	2.51e-66	1.14e-63
EFS	6.27579	-2.56787	0.63566	-4.0397	5.35e-05	0.000239722
CELA3B	4.99195	-0.415201	0.622652	-0.666828	0.504882	0.635832
CDC20B	294.106	-2.54875	0.254127	-10.0294	1.13e-23	5.01e-22
LOC101928043	10.4166	0.215693	0.531121	0.406108	0.684663	0.785052
FAM57B	8.19316	-2.54773	0.584545	-4.35849	1.31e-05	6.73e-05
KCNJ10	7.29508	-2.54496	0.617497	-4.12141	3.77e-05	0.000174715
DPYSL4	187.515	-2.53917	0.208866	-12.1569	5.27e-34	4.61e-32
MIR4418	0	NA	NA	NA	NA	NA
DOCK2	14.9029	-2.53839	0.582035	-4.36123	1.29e-05	6.66e-05
EPHA8	1.44487	-0.6628	0.554173	-1.19602	0.23169	0.35713
MIR6127	0	NA	NA	NA	NA	NA
C1QA	0	NA	NA	NA	NA	NA
C1QC	0	NA	NA	NA	NA	NA
C1QB	0.229455	0.331132	0.337605	0.980827	0.326678	NA
TRABD2B	42.4962	-2.53402	0.364469	-6.95264	3.59e-12	5e-11
MIR4684	0	NA	NA	NA	NA	NA
MIR4253	3.03785	-0.320815	0.635543	-0.504789	0.613707	0.727643
LACTBL1	0.19456	-0.320819	0.33292	-0.963655	0.335219	NA
C1orf234	0.30253	-0.424503	0.37459	-1.13325	0.25711	NA
GSTO2	216.937	-2.53203	0.268045	-9.44629	3.51e-21	1.31e-19
MIR3115	0	NA	NA	NA	NA	NA
MIR4419A	0	NA	NA	NA	NA	NA
LUZP1	4164.21	0.258692	0.216877	1.19281	0.232945	0.358603
MGC12916	35.3233	-2.52922	0.408493	-6.19159	5.96e-10	6.22e-09
DDX25	15.4612	-2.52422	0.524755	-4.81029	1.51e-06	9.21e-06
CSPG5	632.936	-2.51995	0.231378	-10.891	1.27e-27	7.39e-26
ZNF436	1278.03	-0.33168	0.210774	-1.57363	0.115572	0.206719
ZNF436-AS1	144.877	0.3099	0.22227	1.39425	0.163243	0.271848
GJC3	36.4022	-2.51488	0.40914	-6.14673	7.91e-10	8.13e-09
ASAP3	1341.66	0.153242	0.208574	0.734713	0.462514	0.597578
KRTAP1-1	4.91987	-2.51221	0.630507	-3.98443	6.76e-05	0.000296511
LOC101928163	93.9117	-0.232689	0.264647	-0.879243	0.379269	0.517674
MTMR2	5064.99	-2.50211	0.149289	-16.7602	4.77e-63	1.94e-60
MDS2	7.2689	-0.336137	0.567325	-0.592495	0.553519	0.678095
CDKN2AIPNL	1577.08	-2.49377	0.173046	-14.4111	4.41e-47	9.35e-45
SIDT1	326.401	-2.48959	0.238299	-10.4473	1.51e-25	7.66e-24
TCEB3-AS1	422.941	-0.171251	0.173985	-0.984286	0.324975	0.460664
UGT2B10	153.818	-2.48848	0.306773	-8.11179	4.99e-16	1.1e-14
LYPLA2	7536.81	-0.204998	0.140964	-1.45426	0.145875	0.248448
LOC101929705	102.422	-2.48257	0.314545	-7.89256	2.96e-15	5.88e-14
ATP1A3	921.017	-2.48182	0.197193	-12.5857	2.53e-36	2.6e-34
NEB	891.509	-2.47828	0.283808	-8.73225	2.5e-18	7.07e-17
CNR2	0.477928	-0.22454	0.382315	-0.587316	0.556991	NA
MIR378F	0	NA	NA	NA	NA	NA
KRTAP3-1	238.934	-2.47689	0.552023	-4.48693	7.23e-06	3.91e-05
SRSF10	8195.33	-0.125784	0.133111	-0.944955	0.344682	0.482085
LIN7A	810.341	-2.46893	0.19104	-12.9237	3.31e-38	4.2e-36
IL22RA1	1027.94	0.242458	0.13857	1.74972	0.0801665	0.153303
ZNF25	193.151	-2.46799	0.258633	-9.54243	1.4e-21	5.33e-20
LOC284632	0.378575	-0.426295	0.373101	-1.14257	0.253216	NA
PPP1R14D	18.7103	-2.46163	0.458763	-5.36579	8.06e-08	6.11e-07
ADAR	19903.6	-2.45969	0.171623	-14.3319	1.38e-46	2.81e-44
NIPAL3	451.789	0.0855073	0.192257	0.444756	0.656496	0.761924
RCAN3AS	19.7722	-0.646309	0.439509	-1.47053	0.141419	0.242287
LOC284950	7.36848	-2.45921	0.593367	-4.1445	3.41e-05	0.000159979
CBX6	4413.6	-2.45888	0.173856	-14.1432	2.06e-45	3.76e-43
LINC01224	1072	-2.45227	0.167734	-14.62	2.1e-48	4.86e-46
FBXL17	1151.23	-2.44768	0.147273	-16.6201	4.99e-62	1.88e-59
LOC100506730	210.427	-2.44685	0.201875	-12.1206	8.21e-34	7.12e-32
SMIM10L2A	30.4969	-2.4451	0.392125	-6.23551	4.5e-10	4.77e-09
MIR6731	1.98592	-0.129736	0.599853	-0.21628	0.82877	0.88922
MIR4425	0	NA	NA	NA	NA	NA
TAS2R5	15.2655	-2.44461	0.512157	-4.77317	1.81e-06	1.09e-05
C4orf33	500.067	-2.43832	0.193747	-12.5851	2.55e-36	2.61e-34
RHD	6.27404	0.652523	0.594877	1.09691	0.272683	0.40476
IRX3	44.7534	-2.43026	0.472821	-5.13992	2.75e-07	1.91e-06
FGF19	9.20916	-2.42748	0.565595	-4.29191	1.77e-05	8.87e-05
MIR4700	153.312	-2.42291	0.278097	-8.71247	2.97e-18	8.32e-17
FAM86B2	43.4346	-2.42199	0.345733	-7.00537	2.46e-12	3.49e-11
PCDHGB1	35.2038	-2.41783	0.383223	-6.3092	2.8e-10	3.06e-09
SEPN1	15706.7	-0.303129	0.173582	-1.74632	0.0807551	0.154193
MTFR1L	1442.94	-0.0379789	0.142919	-0.265737	0.790442	0.862536
LOC646471	266.258	-0.0279399	0.231236	-0.120828	0.903827	0.940121
ZNF587B	850.146	-2.41293	0.18978	-12.7144	4.92e-37	5.51e-35
TM4SF4	19008.9	-2.41241	0.181322	-13.3045	2.18e-40	3.15e-38
NAP1L2	877.89	-2.41068	0.181183	-13.3052	2.16e-40	3.14e-38
COL19A1	45.2914	-2.41045	0.373747	-6.4494	1.12e-10	1.28e-09
NCMAP	327.785	-2.40043	0.296095	-8.10698	5.19e-16	1.14e-14
PNMAL1	3045.9	-2.39925	0.115856	-20.7089	2.88e-95	3.38e-92
SLC30A2	2.80877	1.06473	0.62208	1.71156	0.0869784	0.163846
TRIM63	1.192	-0.57834	0.529754	-1.09171	0.274958	0.406926
ZG16	13.9292	-2.39734	0.520002	-4.61026	4.02e-06	2.28e-05
GRIN1	44.8453	-2.39671	0.41369	-5.7935	6.89e-09	6.16e-08
ZNF593	1809.09	-0.075206	0.208017	-0.361539	0.717697	0.809938
CNKSR1	43.8179	0.135363	0.413893	0.327049	0.743631	0.828695
CATSPER4	0	NA	NA	NA	NA	NA
LOC101928303	1.05757	-0.285744	0.52179	-0.547623	0.583951	0.703366
CEP85	2360.64	0.102474	0.140198	0.730922	0.464827	0.599477
PTBP1	25383.4	-2.39577	0.146215	-16.3853	2.43e-60	8.99e-58
UBXN11	1086.07	0.202895	0.177155	1.14529	0.252087	0.381405
CD52	1.92419	0.654877	0.627072	1.04434	0.296327	0.430433
LINC00865	9.5553	-2.39435	0.581448	-4.11792	3.82e-05	0.000177131
ZNF683	0.547747	0.342507	0.435366	0.78671	0.431452	NA
FKBP7	645.413	-2.39415	0.198806	-12.0426	2.12e-33	1.8e-31
EFR3B	859.976	-2.38383	0.184913	-12.8916	5.02e-38	6.17e-36
LOC101928324	12.8108	0.380017	0.522856	0.726811	0.467342	0.601748
C17orf51	1087.83	-2.37987	0.186274	-12.7762	2.23e-37	2.54e-35
TMEM74B	110.632	-2.37607	0.297184	-7.99529	1.29e-15	2.71e-14
MIR1976	0	NA	NA	NA	NA	NA
ARID1A	8514.97	-0.133209	0.238719	-0.558018	0.576832	0.697606
PIGV	444.312	0.00943397	0.154739	0.0609669	0.951386	0.969975
TIGIT	2.79882	-2.37541	0.628904	-3.77707	0.000158684	0.000647074
ASB5	5.42059	-2.37175	0.635062	-3.73467	0.000187963	0.000754276
KRAS	2655.31	-2.3712	0.15428	-15.3695	2.62e-53	7.47e-51
C2CD2	6628.34	-2.36851	0.130166	-18.1961	5.54e-74	3.25e-71
LHFPL3	30.539	-2.36281	0.447618	-5.27863	1.3e-07	9.55e-07
NUDC	15001.9	-0.147858	0.18035	-0.819838	0.412308	0.549708
PRKAA1	3403.37	-2.36047	0.151297	-15.6016	7.1e-55	2.14e-52
TRNP1	7829.68	-0.169106	0.115656	-1.46215	0.143699	0.24537
LHFPL3-AS2	55.9984	-2.35633	0.330837	-7.12231	1.06e-12	1.58e-11
HPCAL4	56.5894	-2.35545	0.377511	-6.23942	4.39e-10	4.66e-09
LINC00337	131.2	-2.35533	0.247306	-9.52392	1.67e-21	6.36e-20
TMEM222	1864.85	0.0493778	0.128931	0.382978	0.701736	0.798149
ACTG1P20	124.922	-0.457797	0.366515	-1.24905	0.211646	0.333454
ATP8A1	372.656	-2.3438	0.189343	-12.3786	3.41e-35	3.24e-33
PLEKHD1	9.68498	-2.34298	0.571034	-4.10304	4.08e-05	0.000187524
COL8A2	35.9313	-2.34053	0.400657	-5.84173	5.17e-09	4.72e-08
CD164L2	1.54	-0.539519	0.573648	-0.940505	0.346958	0.484318
OGFRP1	49.3701	-2.3393	0.370345	-6.31653	2.67e-10	2.92e-09
WASF2	9239.73	-0.0914057	0.166139	-0.550178	0.582198	0.701806
WFDC2	12.5604	-2.3349	0.556168	-4.19818	2.69e-05	0.000129447
PCDHGA2	31.5754	-2.3347	0.392401	-5.94978	2.69e-09	2.55e-08
IFI6	2847.57	0.331832	0.255128	1.30065	0.193378	0.31059
MAPK4	240.088	-2.32964	0.295274	-7.88976	3.03e-15	6e-14
MED30	523.748	-2.32908	0.28412	-8.19754	2.45e-16	5.65e-15
URB1-AS1	163.336	-2.32685	0.258016	-9.01823	1.91e-19	6.05e-18
SCARNA1	3.79783	-0.0609467	0.635612	-0.0958866	0.923611	0.952917
ARPIN	2974.03	-2.32607	0.1729	-13.4532	2.95e-41	4.55e-39
RPA2	4668.18	-0.117127	0.14973	-0.782253	0.434066	0.570812
SMPDL3B	701.204	-0.402937	0.208654	-1.93113	0.0534672	0.110037
XKR8	3283.11	-0.120177	0.120282	-0.999124	0.317735	0.452655
EYA3	1462.72	0.0207983	0.162384	0.128081	0.898085	0.936421
SLX4IP	75.1656	-2.32433	0.281792	-8.24837	1.61e-16	3.77e-15
PCDHGA5	24.6309	-2.32253	0.414841	-5.5986	2.16e-08	1.79e-07
B4GALNT4	762.168	-2.31756	0.287897	-8.04996	8.28e-16	1.78e-14
SLC30A3	359.174	-2.30839	0.189005	-12.2134	2.64e-34	2.38e-32
ABCA13	11.7085	-2.30589	0.553218	-4.16814	3.07e-05	0.00014546
EML1	3254	-2.30588	0.143166	-16.1063	2.3e-58	7.78e-56
SNHG3	5714.32	-0.160097	0.196232	-0.815855	0.414583	0.551965
RCC1	6480.08	-0.10278	0.155233	-0.662098	0.507908	0.638835
SNORA73B	233.388	0.149745	0.30461	0.491596	0.623005	0.73469
TRNAU1AP	1025.31	0.101086	0.146801	0.688588	0.491082	0.623654
SEMA3D	70.9229	-2.30518	0.341705	-6.7461	1.52e-11	1.95e-10
SNORD99	48.5792	0.513102	0.341577	1.50216	0.133056	0.231501
SNORA61	519.319	0.338321	0.232162	1.45726	0.145045	0.247287
SNORA44	102.081	0.352883	0.275207	1.28225	0.199756	0.318421
SNORA16A	92.7137	0.188984	0.324091	0.58312	0.559813	0.683168
RAB42	2.51606	-0.173314	0.632869	-0.273854	0.784196	0.858492
UGT2A1	23.9208	-2.30248	0.494912	-4.65231	3.28e-06	1.89e-05
RNU11	1.72936	-0.185877	0.590357	-0.314856	0.752871	0.834846
GMEB1	987.627	0.206946	0.184549	1.12136	0.262134	0.392729
UGT2A2	23.9208	-2.30248	0.494912	-4.65231	3.28e-06	1.89e-05
OPRD1	2.72131	1.21	0.630622	1.91874	0.0550172	0.112689
ITGB6	103.329	-2.30185	0.281664	-8.17231	3.03e-16	6.87e-15
TMEM200B	1891.06	0.154699	0.153045	1.01081	0.312109	0.446764
PCDHGB2	39.8507	-2.30002	0.396521	-5.8005	6.61e-09	5.93e-08
MECR	674.796	0.272802	0.169062	1.61363	0.106608	0.193844
LOC100507506	22.4294	-2.29932	0.46739	-4.91949	8.68e-07	5.55e-06
LOC101928460	0.55947	0.297589	0.403319	0.73785	0.460605	NA
LOC101929406	0	NA	NA	NA	NA	NA
MATN1	80.638	0.0850551	0.294929	0.288392	0.773047	0.850396
MATN1-AS1	142.271	0.116998	0.245256	0.477046	0.633329	0.743154
LINGO1	499.747	-2.29858	0.213775	-10.7523	5.78e-27	3.21e-25
MIR4420	0	NA	NA	NA	NA	NA
ICT1	943.446	-2.29767	0.225137	-10.2057	1.87e-24	8.81e-23
LOC284933	24.0368	-2.28727	0.47256	-4.84017	1.3e-06	8.03e-06
SNORD103A	24.9017	0.433871	0.46962	0.923877	0.355551	0.493449
SNORD103B	24.9017	0.433871	0.46962	0.923877	0.355551	0.493449
SNORD85	7.66981	0.954237	0.630716	1.51294	0.130294	0.22771
NKAIN1	45.2797	-0.24097	0.327951	-0.734776	0.462476	0.597567
SNRNP40	3713.77	0.128652	0.156832	0.820315	0.412036	0.549455
ZCCHC17	2250.64	0.254266	0.147136	1.7281	0.0839709	0.159219
FABP3	18.2569	-0.255479	0.414223	-0.616766	0.537389	0.664758
SLC12A3	616.343	-2.28674	0.267294	-8.55517	1.18e-17	3.09e-16
LINC01225	1.3833	-0.450362	0.548634	-0.820879	0.411715	0.549137
LINC01226	1.25803	0.0194225	0.582053	0.0333689	0.97338	0.98412
CACNB2	607.84	-2.2863	0.220899	-10.35	4.19e-25	2.07e-23
HCRTR1	2.21663	-0.494662	0.611572	-0.808837	0.418609	0.555692
SKIDA1	301.015	-2.28114	0.219133	-10.4099	2.24e-25	1.12e-23
FAM124B	14.4435	-2.28085	0.500267	-4.55926	5.13e-06	2.86e-05
PCDHGA7	31.6516	-2.28012	0.405035	-5.62944	1.81e-08	1.52e-07
MIR4254	0.217729	-0.152487	0.336524	-0.453124	0.650459	NA
MAMDC2	11.138	-2.27892	0.561141	-4.06122	4.88e-05	0.000220891
PCDHGB6	29.8599	-2.27836	0.40677	-5.60109	2.13e-08	1.77e-07
LINC00898	24.5807	-2.27328	0.46103	-4.93087	8.19e-07	5.27e-06
SPP1	60.939	-2.27213	0.399998	-5.68036	1.34e-08	1.15e-07
MIR5585	0.309737	-0.225486	0.350761	-0.64285	0.520321	NA
TUBBP5	12.0514	-2.27169	0.584329	-3.8877	0.000101198	0.000428802
DLG5-AS1	63.2053	-2.26809	0.299823	-7.56477	3.89e-14	6.85e-13
LINC00574	62.17	-2.2621	0.296328	-7.63378	2.28e-14	4.13e-13
SURF4	21025.7	-2.25531	0.125877	-17.9167	8.73e-72	4.84e-69
DCDC2B	81.3223	0.0447621	0.288945	0.154916	0.876888	0.921988
LOXL1-AS1	84.4949	-2.25378	0.254517	-8.8551	8.36e-19	2.51e-17
EIF3I	13585.9	0.313819	0.175484	1.7883	0.0737277	0.143376
MTMR9LP	7.62588	0.575123	0.58389	0.984985	0.324632	0.460303
FAM167B	1.65877	-1.05567	0.580467	-1.81866	0.0689634	0.135814
LCK	31.3628	-0.476115	0.449641	-1.05888	0.289656	0.423086
PCDHGA3	24.1065	-2.2517	0.418919	-5.37502	7.66e-08	5.83e-07
SLC41A1	2780.8	-2.25149	0.17249	-13.0528	6.12e-39	8.24e-37
FAM229A	52.9303	0.210395	0.637115	0.33023	0.741226	0.827172
TSSK3	295.117	0.38324	0.295089	1.29873	0.194038	0.311379
PIGY	1973.72	-2.25059	0.171013	-13.1604	1.48e-39	2.08e-37
PYURF	1973.72	-2.25059	0.171013	-13.1604	1.48e-39	2.08e-37
PCDHGB3	23.708	-2.24967	0.429673	-5.23577	1.64e-07	1.19e-06
ZNF74	960.992	-2.24936	0.1742	-12.9125	3.82e-38	4.76e-36
RTN4RL1	256.381	-2.2488	0.25779	-8.72337	2.7e-18	7.6e-17
KCNRG	26.8281	-2.24797	0.405787	-5.53978	3.03e-08	2.45e-07
ALDH18A1	7976.66	-2.24695	0.150649	-14.9151	2.63e-50	6.98e-48
TMEM223	1285.7	-2.24616	0.160016	-14.037	9.25e-45	1.66e-42
S100PBP	2876.66	0.222391	0.151516	1.46777	0.142166	0.24321
FNDC5	16.2659	0.541832	0.513554	1.05506	0.291397	0.425098
HPCA	98.3716	0.493132	0.315558	1.56273	0.118115	0.210241
CAPNS1	13971.5	-2.24267	0.141571	-15.8414	1.61e-56	5.1e-54
PCDHGA1	25.2802	-2.24241	0.422459	-5.30798	1.11e-07	8.25e-07
HIST1H4J	7.8917	-2.24049	0.597081	-3.75241	0.000175144	0.00070854
CCM2L	19.3214	-2.23938	0.524164	-4.27228	1.93e-05	9.61e-05
TRIM62	572.824	-0.231445	0.17954	-1.2891	0.197363	0.315464
UBR5-AS1	53.9303	-2.23606	0.360933	-6.1952	5.82e-10	6.09e-09
A3GALT2	0.389119	-0.385823	0.356695	-1.08166	0.279404	NA
PCDHGA6	37.0159	-2.23271	0.376989	-5.92247	3.17e-09	2.98e-08
NAP1L6	50.6042	-2.22756	0.359462	-6.19694	5.76e-10	6.02e-09
LOC101929464	3.839	-1.19824	0.633918	-1.89021	0.0587304	0.118912
ZSCAN20	283.181	0.12751	0.180176	0.707701	0.479131	0.612648
CSMD2	1.78059	0.0865364	0.608444	0.142226	0.886902	0.929086
HMGB4	0	NA	NA	NA	NA	NA
CSMD2-AS1	0	NA	NA	NA	NA	NA
C1orf94	0	NA	NA	NA	NA	NA
MIR552	0	NA	NA	NA	NA	NA
PDK4	2041.48	-2.22723	0.207832	-10.7165	8.52e-27	4.66e-25
BIRC5	12524.9	-2.22208	0.167678	-13.2521	4.39e-40	6.29e-38
GJB3	30.5624	-0.386579	0.426046	-0.907364	0.364215	0.502407
GJA4	0.405456	0.168352	0.363168	0.463567	0.642958	NA
LINC00674	4579.42	-2.21856	0.156132	-14.2095	8e-46	1.52e-43
DLGAP3	91.9106	-0.0389921	0.273112	-0.142769	0.886472	0.928929
SYT3	84.1084	-2.21751	0.332588	-6.66745	2.6e-11	3.24e-10
SSTR2	274.492	-2.21464	0.195969	-11.301	1.3e-29	8.65e-28
ARMCX2	3.20264	-2.21099	0.630789	-3.50512	0.00045641	0.00169501
ZMYM1	2097.42	0.129918	0.140728	0.923183	0.355912	0.493842
SFPQ	19571.6	-0.181416	0.12802	-1.41709	0.156458	0.262656
ZMYM4	4235.81	-0.223435	0.157088	-1.42235	0.154924	0.260807
BBS5	524.591	-2.21005	0.162812	-13.5742	5.69e-42	9.15e-40
NCDN	3203.58	-0.0663881	0.180133	-0.36855	0.712463	0.806679
LOXHD1	6.36599	-2.20757	0.627843	-3.51612	0.00043791	0.0016324
PSMB2	15385.2	0.0320918	0.116367	0.275781	0.782716	0.85758
C1orf216	780.32	-0.026701	0.155283	-0.171951	0.863476	0.912701
EDN1	4830.24	-2.20673	0.161571	-13.6579	1.81e-42	2.93e-40
HAS2	42.1282	-2.20518	0.339142	-6.50225	7.91e-11	9.23e-10
HTR7P1	79.3045	-2.20133	0.30799	-7.1474	8.84e-13	1.33e-11
AGO3	1793.87	0.22718	0.165546	1.37231	0.169968	0.280785
TEKT2	3.89384	-0.621033	0.630126	-0.98557	0.324344	0.46005
ADPRHL2	2304.98	-0.143921	0.131206	-1.09691	0.272681	0.40476
B3GALNT1	2714.42	-2.19798	0.154973	-14.183	1.17e-45	2.19e-43
RPARP-AS1	350.531	-2.19787	0.229134	-9.59204	8.64e-22	3.36e-20
LOC100129550	51.5301	-2.19773	0.34725	-6.32895	2.47e-10	2.71e-09
GPR4	49.2353	-2.19754	0.328497	-6.68968	2.24e-11	2.82e-10
PARD6G	286.374	-2.19677	0.185219	-11.8604	1.9e-32	1.5e-30
ALDH3A1	18.4342	-2.19125	0.485716	-4.51138	6.44e-06	3.52e-05
FOXN3-AS1	65.3245	-2.18916	0.334145	-6.55153	5.7e-11	6.82e-10
S100A9	130.368	-2.1884	0.374587	-5.84217	5.15e-09	4.71e-08
OSCP1	210.237	0.0628807	0.19754	0.31832	0.750242	0.832948
FMN2	5.41326	-2.18351	0.632888	-3.45007	0.00056045	0.0020382
CSF3R	4.98188	1.05855	0.618975	1.71017	0.0872352	0.164283
GRIK3	0	NA	NA	NA	NA	NA
MIR4255	0	NA	NA	NA	NA	NA
AQP5	3.35289	-2.18319	0.63235	-3.4525	0.000555422	0.00202315
PCDHGC4	22.1354	-2.18208	0.431021	-5.06257	4.14e-07	2.8e-06
MIR6732	13.8234	1.0402	0.557102	1.86717	0.0618779	0.124092
ZFHX4	22.5898	-2.18205	0.496614	-4.39385	1.11e-05	5.82e-05
MIR5581	7.68235	0.604672	0.605033	0.999403	0.3176	0.452527
FTO	773.615	-2.18095	0.176191	-12.3783	3.43e-35	3.24e-33
DNALI1	58.4238	-0.205577	0.359043	-0.572569	0.566936	0.689161
GNL2	5734.69	-0.0630734	0.123817	-0.509407	0.610467	0.72483
RHBDL3	20.0394	-2.17714	0.493634	-4.41044	1.03e-05	5.42e-05
C1orf109	2779.24	0.140511	0.127157	1.10502	0.26915	0.401022
BTBD10	1694.71	-2.17521	0.15719	-13.8381	1.5e-43	2.58e-41
PCDHGA12	26.6635	-2.16553	0.421003	-5.14374	2.69e-07	1.88e-06
LOC338797	3.72797	-2.16456	0.633737	-3.41555	0.000636535	0.00228767
YRDC	5188.56	-0.0978837	0.130445	-0.750386	0.453022	0.588289
C1orf122	3102.22	-0.131589	0.178233	-0.7383	0.460332	0.595376
PTGER3	36.1558	-2.16249	0.384753	-5.62047	1.9e-08	1.6e-07
INPP5B	1490.72	0.238544	0.134165	1.77799	0.0754058	0.14585
SF3A3	6350	0.207824	0.15608	1.33152	0.183018	0.297911
PCDHGB7	26.8377	-2.16088	0.41594	-5.19517	2.05e-07	1.45e-06
UTP11L	4071.88	0.0963806	0.150199	0.641686	0.521077	0.649945
OTOP3	6.20905	-2.15746	0.630849	-3.41993	0.000626374	0.00225685
MIR3659	0	NA	NA	NA	NA	NA
LINC01343	0	NA	NA	NA	NA	NA
F8A1	2132.58	-2.15702	0.138941	-15.5247	2.36e-54	6.92e-52
CDIPT	3158.69	-2.15557	0.111423	-19.3458	2.21e-83	1.76e-80
UGT2B17	11.7479	-2.15138	0.539142	-3.99038	6.6e-05	0.00028989
DRD5	164.667	-2.14936	0.315349	-6.81581	9.37e-12	1.24e-10
LOC375196	27.9744	-2.14541	0.44478	-4.82354	1.41e-06	8.67e-06
ZNF664-FAM101A	652.721	-2.14472	0.407638	-5.26134	1.43e-07	1.04e-06
NDUFS5	9901.51	-0.235915	0.156962	-1.50301	0.132837	0.231281
LSM1	3033.5	-2.14187	0.155064	-13.8128	2.13e-43	3.6e-41
KIAA0754	1864.86	0.859155	0.544771	1.57709	0.114774	0.20556
BMP8A	827.71	-0.376297	0.194789	-1.93182	0.0533815	0.109906
PPIEL	71.248	-0.363549	0.298421	-1.21824	0.223132	0.346944
PABPC4	15400.4	0.172101	0.119625	1.43867	0.150245	0.254472
LOC101929516	2650.95	0.229006	0.142434	1.60781	0.107877	0.195565
SNORA55	24.8028	-0.460264	0.472124	-0.974879	0.32962	0.465957
LINC01419	2291.14	-2.14099	0.17337	-12.3493	4.92e-35	4.62e-33
NT5C1A	0.552047	-0.455693	0.381287	-1.19514	0.232031	NA
GFAP	45.3493	-2.13874	0.348828	-6.13122	8.72e-10	8.91e-09
PPIE	2460.66	0.219963	0.1715	1.28259	0.199636	0.318281
CXorf49B	20.6509	-2.13668	0.520715	-4.10335	4.07e-05	0.000187358
OXCT2	82.6029	-0.214324	0.264159	-0.811344	0.417168	0.554296
CXorf49	20.6509	-2.13668	0.520715	-4.10335	4.07e-05	0.000187358
LINC00312	46.7434	-2.13659	0.384651	-5.55463	2.78e-08	2.26e-07
KCNQ4	53.901	-2.13484	0.330783	-6.45391	1.09e-10	1.24e-09
KREMEN1	1812.02	-2.12712	0.132534	-16.0497	5.75e-58	1.91e-55
ANGPTL1	772.692	-2.11804	0.241303	-8.77749	1.67e-18	4.85e-17
RUNDC3A	44.3065	-2.11761	0.348988	-6.06786	1.3e-09	1.29e-08
TMCO2	0.774266	0.156729	0.474834	0.330072	0.741346	NA
ZMPSTE24	8595.66	0.092951	0.166961	0.556721	0.577718	0.698518
COL9A2	95.8527	0.536692	0.378632	1.41745	0.156352	0.262527
FAM223A	15.26	-2.11591	0.529754	-3.99414	6.49e-05	0.000285883
FAM223B	15.26	-2.11591	0.529754	-3.99414	6.49e-05	0.000285883
MIR1184-3	552.85	-2.11432	0.158034	-13.3789	8.03e-41	1.21e-38
EXO5	449.244	-0.124967	0.157594	-0.792968	0.427796	0.564766
ZNF684	327.573	0.201689	0.177676	1.13515	0.256312	0.38596
MIR1184-2	552.85	-2.11432	0.158034	-13.3789	8.03e-41	1.21e-38
NFYC-AS1	282.734	-0.259369	0.180997	-1.433	0.151858	0.256686
NFYC	2698.7	-0.253609	0.131437	-1.92951	0.0536679	0.110359
MIR30E	0	NA	NA	NA	NA	NA
MIR30C1	0.125721	0	0.301155	0	1	NA
MIR1184-1	552.85	-2.11432	0.158034	-13.3789	8.03e-41	1.21e-38
FCRL5	10.4882	-2.11353	0.605771	-3.48898	0.000484859	0.001789
DMRTA2	10.8144	-2.1122	0.597546	-3.5348	0.000408091	0.00153242
CHST2	33.9389	-2.10537	0.442183	-4.76131	1.92e-06	1.15e-05
SLFNL1	32.6108	-0.304353	0.42831	-0.710591	0.477338	0.610957
HOXA6	38.9844	-2.10449	0.40983	-5.13503	2.82e-07	1.96e-06
ITGA2B	109.912	-2.10269	0.317844	-6.61548	3.7e-11	4.55e-10
CCSAP	2565.35	-2.10264	0.147123	-14.2917	2.47e-46	4.92e-44
HIVEP3	21.7641	0.0692147	0.427049	0.162077	0.871246	0.918154
GUCA2B	5.46925	-0.101287	0.608069	-0.166571	0.867708	0.915572
CIPC	597.938	-2.10247	0.224617	-9.36024	7.96e-21	2.85e-19
FOXJ3	5118.32	-0.0862833	0.155785	-0.553863	0.579673	0.699905
LINC01063	14.9427	-2.10211	0.512838	-4.09896	4.15e-05	0.000190288
ZMYND12	3.19988	0.708629	0.637051	1.11236	0.265984	0.397302
SGK1	98.6849	-2.1019	0.307606	-6.83312	8.31e-12	1.1e-10
CCDC30	6.11598	0.0292117	0.567148	0.0515064	0.958922	0.974469
PPIH	1389.57	0.114865	0.159409	0.720568	0.471175	0.605276
YBX1	61307.2	-0.205933	0.12981	-1.58642	0.112644	0.202675
CLDN19	7.36452	-1.01778	0.590665	-1.72312	0.0848677	0.160522
P3H1	6784.53	0.212867	0.15089	1.41074	0.158322	0.265182
VSIG1	2650.67	-2.10095	0.18521	-11.3436	7.98e-30	5.39e-28
LOC100129924	3.77204	-0.326457	0.634792	-0.514274	0.607061	0.722945
SVBP	691.19	0.126097	0.182138	0.692317	0.488739	0.621424
SOX21-AS1	12.1672	-2.09843	0.551949	-3.80185	0.000143619	0.000590472
ZIK1	221.111	-2.09759	0.245078	-8.55887	1.14e-17	3.01e-16
LOC339539	0.520024	0.158507	0.433398	0.365731	0.714566	NA
SLC2A1	4797.09	0.0711135	0.131162	0.542181	0.587694	0.706636
SLC2A1-AS1	13.5145	0.230508	0.491938	0.468572	0.639376	0.748109
FAM183A	4.50892	0.647931	0.625845	1.03529	0.300534	0.434706
EBNA1BP2	7285.5	-0.0799037	0.172068	-0.464373	0.64238	0.750699
MIR6733	21.2194	-0.0875058	0.427894	-0.204504	0.83796	0.895129
EHD3	667.251	-2.09643	0.165369	-12.6773	7.9e-37	8.65e-35
TMEM125	72.7877	-0.0987444	0.324029	-0.30474	0.760564	0.840501
C1orf210	200.526	-0.179517	0.212838	-0.843445	0.39898	0.537183
TIE1	5.79589	0.656598	0.606437	1.08271	0.278936	0.411224
MPL	10.0612	-0.495368	0.517587	-0.957072	0.338531	0.475551
TMEM121	56.6208	-2.09509	0.364637	-5.74569	9.15e-09	8.01e-08
NMB	1164.79	-2.09181	0.206741	-10.118	4.6e-24	2.1e-22
MIR6734	13.5605	0.78269	0.55266	1.41622	0.15671	0.262994
PCSK1	2892.51	-2.09169	0.231231	-9.04588	1.48e-19	4.75e-18
SYP	807.076	-2.0907	0.183674	-11.3827	5.1e-30	3.51e-28
MIR6735	6.50557	-0.350317	0.608592	-0.575619	0.564873	0.687294
HYI	1460.64	-0.0249835	0.149961	-0.1666	0.867685	0.915572
ATE1	3564.74	-2.08833	0.180117	-11.5943	4.4e-31	3.25e-29
MFSD6	3513.7	-2.08811	0.141533	-14.7536	2.92e-49	7.18e-47
GORASP1	2417.97	-2.08744	0.156179	-13.3657	9.6e-41	1.42e-38
PPP2R3A	585.079	-2.08696	0.164604	-12.6787	7.76e-37	8.55e-35
TCAF2	129.692	-2.08405	0.275501	-7.56458	3.89e-14	6.86e-13
MIR6079	0	NA	NA	NA	NA	NA
ARTN	9.67455	-0.147857	0.561676	-0.263243	0.792363	0.863939
IPO13	3378.36	-0.103917	0.144588	-0.718707	0.472322	0.606436
SLC22A8	21.0332	-2.08298	0.452654	-4.6017	4.19e-06	2.37e-05
CACNG7	450.946	-2.08166	0.260706	-7.98471	1.41e-15	2.94e-14
PPY	2.32838	-2.07965	0.618963	-3.3599	0.000779701	0.00275208
PCDHGC5	22.0629	-2.07964	0.431785	-4.81639	1.46e-06	8.96e-06
SLC6A9	924.947	-0.0478387	0.143798	-0.332681	0.739375	0.825939
KLF17	0.113243	-0.250677	0.304978	-0.821954	0.411103	NA
DMAP1	1671.52	-0.17862	0.147044	-1.21474	0.224467	0.348475
ERI3	2497.74	-0.0419812	0.160684	-0.261266	0.793888	0.865112
ERI3-IT1	17.0641	-0.487641	0.449849	-1.08401	0.278361	0.410718
RNF220	3985.86	0.0221379	0.130858	0.169175	0.865659	0.914206
MIR5584	0	NA	NA	NA	NA	NA
TMEM53	1069.34	-0.0384323	0.167477	-0.229478	0.818498	0.881871
C1orf21	4.18862	-2.07505	0.635859	-3.26338	0.00110091	0.00374781
LOC100294145	5066.51	-2.07354	0.203505	-10.1891	2.22e-24	1.03e-22
SLITRK5	113.501	-2.07337	0.246661	-8.40574	4.25e-17	1.06e-15
SNORD55	33.256	-0.66515	0.403024	-1.6504	0.0988614	0.182336
SNORD46	80.5223	0.380526	0.351931	1.08125	0.279585	0.411938
SNORD38A	46.3577	-0.00078446	0.394885	-0.00198655	0.998415	0.99987
SNORD38B	234.653	0.262925	0.32628	0.805828	0.420342	0.557436
BEST4	12.5872	0.688384	0.597875	1.15138	0.249574	0.378319
PLK3	563.304	-0.209516	0.185081	-1.13202	0.257624	0.387456
TCTEX1D4	16.7913	0.456072	0.442584	1.03048	0.302786	0.436799
BTBD19	13.9302	0.272688	0.500369	0.544973	0.585772	0.705091
PTCH2	28.391	-0.362812	0.445187	-0.814965	0.415093	0.552422
ACCS	3.50865	-2.071	0.635095	-3.26092	0.0011105	0.00377591
MACC1	14.323	-2.06965	0.537195	-3.85269	0.000116825	0.000487655
AVIL	72.8671	-2.06554	0.361253	-5.7177	1.08e-08	9.33e-08
SAA4	204.233	-2.06525	0.343093	-6.01951	1.75e-09	1.71e-08
LINC01144	30.9709	-0.2382	0.429389	-0.554743	0.57907	0.699483
MFN1	1689.84	-2.0625	0.132537	-15.5617	1.32e-54	3.94e-52
PABPC4L	59.7776	-2.06059	0.341192	-6.03937	1.55e-09	1.53e-08
TOE1	1753.3	-0.159488	0.131481	-1.21301	0.225125	0.349328
TESK2	245.329	0.266369	0.192123	1.38645	0.165608	0.275098
CCDC163P	795.875	0.221942	0.127086	1.7464	0.0807421	0.154193
MMACHC	1174.19	0.0975014	0.207674	0.469493	0.638718	0.747646
PRDX1	39271.1	0.279649	0.163044	1.71518	0.0863128	0.162848
PCDHGA4	26.4758	-2.06006	0.389123	-5.29411	1.2e-07	8.84e-07
NASP	10178.8	-0.179335	0.141463	-1.26772	0.204897	0.325082
LINC00261	3015.31	-2.05789	0.158855	-12.9545	2.21e-38	2.87e-36
GPBP1L1	5714.05	0.0158671	0.135201	0.117359	0.906575	0.941776
RPS15AP10	3.59307	0.638659	0.635532	1.00492	0.314935	0.449727
CCND1	24376.5	-2.05582	0.116802	-17.6009	2.42e-69	1.27e-66
IPP	812.441	0.169236	0.158519	1.06761	0.285698	0.418686
NRGN	152.917	-2.0552	0.31429	-6.53919	6.19e-11	7.36e-10
PIK3R3	2087.28	0.23213	0.191716	1.2108	0.225971	0.350182
LOC101929626	5.16214	-0.392359	0.608041	-0.645284	0.518743	0.647715
TSPAN1	55.7222	-0.477281	0.438855	-1.08756	0.27679	0.409089
LINC00242	92.0412	-2.053	0.284544	-7.21506	5.39e-13	8.29e-12
LURAP1	0.661943	-0.460455	0.462077	-0.996489	0.319012	NA
LINC01036	12.6183	-2.05289	0.547073	-3.75249	0.000175084	0.000708439
F8A3	963.81	-2.04844	0.167869	-12.2026	3.01e-34	2.69e-32
UQCRH	7935.32	-0.231377	0.189484	-1.22109	0.222053	0.345697
NSUN4	2475.14	0.0963569	0.126626	0.760958	0.446682	0.582484
FAAH	70.5337	-0.267209	0.324441	-0.823598	0.410168	0.547624
FAAHP1	1.40408	0.393227	0.571791	0.687711	0.491635	0.624117
LINC01398	0	NA	NA	NA	NA	NA
DMBX1	6.44464	-0.654625	0.586901	-1.11539	0.264683	0.395684
F8A2	963.81	-2.04844	0.167869	-12.2026	3.01e-34	2.69e-32
KNCN	0.754326	0	0.419301	0	NA	NA
ISPD-AS1	4.21545	-2.03971	0.635022	-3.21203	0.00131802	0.0044012
PCDHGA11	36.5961	-2.0384	0.373257	-5.46113	4.73e-08	3.72e-07
ZCCHC12	69.2068	-2.03821	0.339941	-5.99578	2.03e-09	1.96e-08
TEX38	2.47709	0.0117827	0.618869	0.0190391	0.98481	0.991876
VANGL2	24.5635	-2.03381	0.474019	-4.29057	1.78e-05	8.92e-05
LOC100506804	13.4328	-2.02987	0.501084	-4.05097	5.1e-05	0.000229649
CYP4B1	0.226486	-0.33193	0.337325	-0.984004	0.325113	NA
CYP4Z2P	0	NA	NA	NA	NA	NA
CYP4A11	0.665915	0.199993	0.462094	0.432797	0.665163	NA
CYP4X1	1.90577	-0.232161	0.623304	-0.372468	0.709545	0.804473
CYP4Z1	0.43943	0.476554	0.391423	1.21749	0.223418	NA
CYP4A22	0.19025	-0.0416028	0.335389	-0.124043	0.901281	NA
LINC00853	27.1439	-0.466859	0.418251	-1.11622	0.26433	0.395334
SALRNA1	3.58257	-2.02848	0.633694	-3.20103	0.00136935	0.00455279
ZNF785	66.7879	-2.02822	0.307052	-6.60548	3.96e-11	4.86e-10
STIL	3117.11	0.114224	0.1325	0.862066	0.388651	0.526907
C3orf52	1878.84	-2.02607	0.145303	-13.9437	3.43e-44	6.06e-42
LINC01389	6.84238	0.0552247	0.581767	0.0949258	0.924374	0.95331
OGDHL	64.9046	-2.02259	0.299668	-6.74942	1.48e-11	1.91e-10
FOXD2-AS1	372.972	0.116356	0.196874	0.591019	0.554507	0.678681
FOXD2	306.536	0.21582	0.205908	1.04814	0.294574	0.428518
PTGS2	82.6157	-2.02033	0.36515	-5.53288	3.15e-08	2.54e-07
SKINTL	0	NA	NA	NA	NA	NA
SLC5A9	1336.5	0.323057	0.214228	1.50801	0.131552	0.229506
MSX1	35.3328	-2.01967	0.455125	-4.43763	9.1e-06	4.82e-05
AGBL4	0.48971	0.441467	0.428445	1.03039	0.302825	NA
BEND5	0	NA	NA	NA	NA	NA
LOC101929721	0.113243	-0.250677	0.304978	-0.821954	0.411103	NA
AGBL4-IT1	0.0770069	0.218493	0.2965	0.736907	0.461179	NA
ELAVL4	0.38314	-0.233755	0.355872	-0.65685	0.511278	NA
E2F5	2312.09	-2.0176	0.178178	-11.3235	1e-29	6.73e-28
HMGN2	6200.75	-2.01758	0.19773	-10.2037	1.91e-24	8.97e-23
CDKN2C	1447.83	-0.225021	0.141088	-1.5949	0.110735	0.19987
MIR4421	0	NA	NA	NA	NA	NA
MIR6500	0	NA	NA	NA	NA	NA
C1orf185	0	NA	NA	NA	NA	NA
RNF11	7681.73	-0.14259	0.126024	-1.13145	0.257867	0.387645
TTC39A	368.76	-0.00195502	0.191716	-0.0101975	0.991864	0.996011
TTC39A-AS1	3.24104	0.306627	0.63607	0.482065	0.62976	0.740291
RGS6	7.1002	-2.01415	0.627523	-3.20968	0.00132885	0.00443513
SBK1	291.143	-2.01255	0.192902	-10.433	1.75e-25	8.87e-24
CACNA1S	9.13034	-2.01152	0.560917	-3.58613	0.000335628	0.0012855
MIR761	86.5818	0.408377	0.302852	1.34844	0.177517	0.290785
BPGM	1109.85	-2.00685	0.158824	-12.6357	1.34e-36	1.42e-34
POU3F1	3.3317	-2.00533	0.634321	-3.16138	0.00157024	0.00514137
KTI12	1254.17	0.243438	0.132757	1.83371	0.0666971	0.132135
TXNDC12-AS1	3.01093	0.0248616	0.631952	0.039341	0.968619	0.980723
MAGEA10	2001.64	-2.00526	0.138418	-14.487	1.46e-47	3.28e-45
ZFYVE9	2613.95	0.12155	0.134868	0.901256	0.367452	0.505526
SLC16A10	293.952	-2.00406	0.204565	-9.79669	1.16e-22	4.81e-21
HHEX	5876.22	-2.00262	0.161329	-12.4133	2.21e-35	2.14e-33
PRPF38A	2907.41	0.196486	0.151293	1.29872	0.194041	0.311379
ZCCHC11	3980.14	-0.00555404	0.16171	-0.0343456	0.972602	0.983664
GPX7	0.251442	0	0.335132	0	1	NA
FAM159A	0	NA	NA	NA	NA	NA
DZIP1	1636.33	-2.00132	0.148272	-13.4976	1.61e-41	2.55e-39
ZYG11B	4602.44	-0.024897	0.189895	-0.13111	0.895689	0.93467
PCDHGA9	31.2127	-2.00063	0.393826	-5.07998	3.77e-07	2.57e-06
ECHDC2	617.435	-0.293328	0.200699	-1.46153	0.14387	0.245579
SCP2	8583.89	0.0376182	0.162766	0.231118	0.817223	0.881195
MIR1273F	0.902167	0.433744	0.514079	0.843731	0.39882	NA
MIR5095	0.256104	0	0.335652	0	1	NA
MIR1273G	0	NA	NA	NA	NA	NA
PODN	1.80714	-0.290636	0.611915	-0.474962	0.634814	0.744345
SLC1A7	23.3964	-0.646021	0.493568	-1.30888	0.190575	0.307202
CPT2	2093.68	-0.0917041	0.118878	-0.771415	0.440461	0.5769
C1orf123	1340.61	-0.0197056	0.171945	-0.114604	0.908759	0.943111
MAGOH	2420.07	0.184314	0.174371	1.05702	0.290501	0.423979
ADAMTS7	111.837	-1.99654	0.321047	-6.21885	5.01e-10	5.27e-09
CTTNBP2	9.52731	-1.99491	0.557647	-3.57736	0.000347075	0.00132451
RGS13	12.5079	-1.99345	0.587115	-3.39534	0.000685446	0.00244976
SLC25A3P1	0	NA	NA	NA	NA	NA
DMRTB1	0.697444	-0.198976	0.428305	-0.464565	0.642243	NA
LOC101927604	14.2426	-1.99329	0.477979	-4.17024	3.04e-05	0.000144262
RS1	4.18104	-1.99313	0.632575	-3.15083	0.0016281	0.0053129
TMPPE	245.208	-1.99247	0.318257	-6.26057	3.84e-10	4.11e-09
DIO1	734.618	-0.276005	0.198756	-1.38866	0.164936	0.274164
HSPB11	4112.89	0.377747	0.200846	1.88078	0.0600022	0.121
KIAA1549L	9.57335	-1.98927	0.574515	-3.46253	0.000535127	0.00195638
SLC25A22	2410.67	-1.98917	0.136137	-14.6115	2.37e-48	5.43e-46
GABRD	10.5862	-1.98632	0.54768	-3.62679	0.000286961	0.00111162
AQP6	5.20484	-1.9862	0.623143	-3.18739	0.00143564	0.00475099
MIR4781	0	NA	NA	NA	NA	NA
CDCP2	0.380499	-0.0562187	0.359174	-0.156522	0.875621	NA
MYOD1	50.5247	-1.9838	0.466545	-4.25212	2.12e-05	0.000104269
PIN1	1067.82	-1.98294	0.194551	-10.1924	2.14e-24	1e-22
FIBIN	31.4533	-1.97844	0.405655	-4.87716	1.08e-06	6.76e-06
SSBP3-AS1	24.6033	-0.259096	0.479165	-0.540724	0.588698	0.707673
EPHB3	98.0217	-1.97753	0.292369	-6.76383	1.34e-11	1.74e-10
FABP6	37.7314	-1.97462	0.453882	-4.35051	1.36e-05	6.97e-05
MROH7	7.77341	0.960016	0.571425	1.68004	0.0929497	0.173703
MROH7-TTC4	3168.4	0.245556	0.157729	1.55683	0.119512	0.212252
TTC4	3306.66	0.252785	0.156964	1.61046	0.107298	0.194813
PARS2	871.92	-0.107035	0.157962	-0.677601	0.498025	0.629522
TTC22	1.64566	-0.14331	0.590365	-0.242748	0.808201	0.874824
ZNF33B	982.529	-1.97364	0.188391	-10.4763	1.11e-25	5.69e-24
DHCR24	90146.9	0.00850283	0.172582	0.0492684	0.960705	0.975488
LOC100287846	6.24386	-1.97328	0.595375	-3.31436	0.000918542	0.00318462
BSND	6.71061	0.0716198	0.621939	0.115156	0.908322	0.94287
ARAP3	17.0558	-1.97202	0.505877	-3.89821	9.69e-05	0.000412109
TBXA2R	32.8532	-1.96816	0.399642	-4.92481	8.44e-07	5.42e-06
LOC100507634	79.4302	0.156954	0.293909	0.534023	0.593326	0.711648
MIR4422	0	NA	NA	NA	NA	NA
TLR5	4.06337	-1.96736	0.632713	-3.1094	0.00187468	0.00601032
FREM3	6.90611	-1.96569	0.608255	-3.23169	0.00123059	0.00412861
C1orf168	22.6863	-0.0497589	0.46253	-0.10758	0.914329	0.946673
C8A	223.924	-0.294058	0.249343	-1.17933	0.238266	0.365401
CTGF	5572.62	-1.96325	0.205657	-9.54624	1.34e-21	5.15e-20
DAB1	0.226486	-0.33193	0.337325	-0.984004	0.325113	NA
DAB1-AS1	0	NA	NA	NA	NA	NA
OMA1	1060.05	0.291983	0.158712	1.8397	0.0658119	0.130563
TACSTD2	1.01227	0.00757234	0.517347	0.0146369	0.988322	NA
MYSM1	3378.17	0.0923274	0.175717	0.525434	0.599282	0.71679
MGLL	1345.43	-1.96277	0.201274	-9.75174	1.81e-22	7.36e-21
LINC01135	1.49287	-0.132383	0.596167	-0.222057	0.82427	0.886396
LINC01358	1.15199	0.744603	0.568708	1.30929	0.190437	0.307052
HSD52	0.845959	-0.615333	0.493121	-1.24783	0.212092	NA
FAM91A1	6930.58	-1.96095	0.12653	-15.4979	3.58e-54	1.04e-51
MIR4711	0	NA	NA	NA	NA	NA
LOC101926944	0	NA	NA	NA	NA	NA
HOOK1	5026.13	0.344157	0.175873	1.95685	0.0503649	0.104657
ARV1	960.208	-1.9606	0.165205	-11.8677	1.74e-32	1.39e-30
C1orf87	0	NA	NA	NA	NA	NA
LOC101926964	0	NA	NA	NA	NA	NA
NFIA-AS2	0	NA	NA	NA	NA	NA
LZTS1	11.4762	-1.96014	0.581327	-3.37183	0.000746698	0.00264496
NFIA-AS1	0.542764	0.226273	0.395837	0.571631	0.567572	NA
MGC34796	0	NA	NA	NA	NA	NA
TM2D1	1890.31	0.243369	0.161718	1.5049	0.13235	0.230614
MAP6	36.5716	-1.95891	0.365241	-5.36333	8.17e-08	6.19e-07
MIR3116-1	0	NA	NA	NA	NA	NA
MIR3116-2	0	NA	NA	NA	NA	NA
L1TD1	0.154014	0.3016	0.325674	0.92608	0.354404	NA
KANK4	3.91035	-0.0546346	0.624749	-0.0874505	0.930313	0.957305
USP1	8427.5	0.0388775	0.138466	0.280773	0.778885	0.854433
DOCK7	6626.14	-0.269909	0.170022	-1.5875	0.1124	0.202363
ANGPTL3	13.8326	0.762328	0.497393	1.53265	0.125363	0.220853
ATG4C	666.061	-0.328087	0.235911	-1.39073	0.164309	0.273258
LINC00466	0	NA	NA	NA	NA	NA
FOXD3-AS1	27.7215	-0.560368	0.445668	-1.25737	0.20862	0.329685
FOXD3	18.1521	-0.603764	0.479464	-1.25925	0.207941	0.328831
MIR6068	0	NA	NA	NA	NA	NA
SFXN1	5731.53	-1.95745	0.14632	-13.3779	8.14e-41	1.22e-38
ITGB3BP	1263.96	0.0509941	0.232155	0.219655	0.82614	0.887408
EFCAB7	541.992	-0.301713	0.179849	-1.67759	0.0934272	0.174428
DLEU2L	21.7941	0.560422	0.429933	1.30351	0.1924	0.309592
PGM1	9408.43	0.0360831	0.162692	0.221788	0.824479	0.886525
IL17D	79.3424	-1.95662	0.278304	-7.0305	2.06e-12	2.95e-11
ROR1-AS1	0.260765	0	0.336166	0	1	NA
UBE2U	0.251442	0	0.335132	0	1	NA
CACHD1	18.3295	-0.375595	0.454132	-0.827062	0.408202	0.546022
MIR4794	0	NA	NA	NA	NA	NA
ZNF649	369.085	-1.95614	0.196836	-9.93792	2.85e-23	1.22e-21
LOC103908605	70.6234	-1.95457	0.297913	-6.56089	5.35e-11	6.45e-10
LINC01359	1.74385	0.681147	0.630222	1.08081	0.279784	0.412169
MIR3671	3.67229	0.161094	0.636008	0.25329	0.800045	0.869378
MIR101-1	0	NA	NA	NA	NA	NA
GALNTL6	52.0728	-1.95131	0.311933	-6.25554	3.96e-10	4.23e-09
BCL6B	6.59152	-1.95109	0.610885	-3.19387	0.00140381	0.00465724
PCDHGA10	37.442	-1.95033	0.36171	-5.39196	6.97e-08	5.34e-07
LEPR	603.021	-0.131828	0.163043	-0.808549	0.418775	0.555875
MIF4GD	2212.08	-1.94973	0.172602	-11.2961	1.37e-29	9.11e-28
LOC101927139	0.125721	0	0.301155	0	1	NA
SGIP1	33.9542	-0.693199	0.427416	-1.62184	0.104839	0.191237
MIR3117	0.184016	-0.31672	0.331255	-0.956122	0.339011	NA
TCTEX1D1	0	NA	NA	NA	NA	NA
INSL5	0.260765	0	0.336166	0	1	NA
EIF2B2	897.384	-1.9493	0.149486	-13.04	7.24e-39	9.69e-37
SMIM10L2B	88.8432	-1.94736	0.254865	-7.64076	2.16e-14	3.93e-13
SLC35D1	6579.25	-0.238499	0.164808	-1.44713	0.147859	0.251162
C1orf141	0	NA	NA	NA	NA	NA
IL23R	0.984576	-0.535483	0.533275	-1.00414	0.315311	NA
IL12RB2	4.39502	-0.416491	0.637057	-0.653773	0.513258	0.643336
SERBP1	45198.3	-0.247152	0.167282	-1.47746	0.139553	0.239976
ATP6V1B1-AS1	7.69072	-1.9365	0.589416	-3.28546	0.00101817	0.00349779
GNG12	149.805	-0.270401	0.233282	-1.15911	0.24641	0.374891
GNG12-AS1	0.53374	-0.112612	0.433176	-0.259969	0.794888	NA
DIRAS3	0.671267	-0.460171	0.463385	-0.993064	0.320679	NA
WLS	1.09528	-0.390201	0.559105	-0.697903	0.485238	0.618204
MIR1262	0	NA	NA	NA	NA	NA
RPE65	0.0920078	-0.234211	0.300577	-0.779204	0.43586	NA
PAX2	2.4452	-1.93612	0.62492	-3.09819	0.00194704	0.00621731
DEPDC1-AS1	7.60156	0.451934	0.576524	0.783895	0.433101	0.569882
FRMD6-AS1	13.1695	-1.93576	0.511638	-3.78346	0.000154662	0.000632096
PIN1P1	1.20943	-0.0148073	0.534306	-0.0277132	0.977891	0.987052
THY1	46.511	-1.93517	0.46422	-4.16864	3.06e-05	0.000145214
SRSF11	17009.5	0.162766	0.136674	1.1909	0.233692	0.359493
GLT8D2	59.0595	-1.93132	0.315279	-6.12574	9.03e-10	9.22e-09
LOC100133669	5.89827	-1.9284	0.621198	-3.10433	0.00190711	0.00610154
AS3MT	8757.36	-1.92682	0.223742	-8.61178	7.19e-18	1.94e-16
LOC101927244	0.34067	-0.215474	0.352777	-0.610793	0.541337	NA
CD274	107.792	-1.92474	0.298499	-6.44809	1.13e-10	1.29e-09
TEAD2	1994.56	-1.92366	0.149877	-12.835	1.04e-37	1.25e-35
GNPDA1	8284.61	-1.92196	0.130068	-14.7766	2.07e-49	5.23e-47
MIR186	13.5045	-0.544866	0.494121	-1.1027	0.270159	0.402002
ZRANB2-AS2	1.60691	0.572896	0.613134	0.934372	0.350112	0.487593
NEGR1	2.54783	1.11406	0.621444	1.7927	0.0730212	0.142371
NEGR1-IT1	0	NA	NA	NA	NA	NA
LINC01360	0	NA	NA	NA	NA	NA
LRRIQ3	19.559	-0.00733161	0.445859	-0.0164438	0.98688	0.993116
FPGT	1403.54	-0.208386	0.198277	-1.05099	0.293265	0.427198
FPGT-TNNI3K	240.482	-0.06351	0.201002	-0.315967	0.752028	0.834294
TNNI3K	1.34127	0.533225	0.550625	0.9684	0.332845	0.46945
MAP6D1	315.614	-1.92028	0.210014	-9.14357	6.04e-20	2.01e-18
ERICH3-AS1	1.38367	-0.630545	0.583552	-1.08053	0.279907	0.412259
CRYZ	13629.9	0.0945992	0.141658	0.667801	0.50426	0.635129
TYW3	2955.52	-0.00548021	0.128929	-0.0425056	0.966096	0.978964
LHX8	0.209975	0.324612	0.335064	0.968806	0.332642	NA
SLC44A5	62.3231	0.293721	0.303097	0.969068	0.332511	0.469124
ACADM	4358.05	0.0658337	0.153258	0.429561	0.667515	0.771075
DLSTP1	27.8464	0.311947	0.370982	0.840869	0.400421	0.538502
LINC01123	59.5178	-1.92003	0.375124	-5.11838	3.08e-07	2.13e-06
SNORD45C	49.2975	-0.24773	0.354732	-0.698359	0.484953	0.617996
SNORD45A	68.4911	0.179264	0.366006	0.489783	0.624287	0.735869
SNORD45B	114.825	-0.11046	0.314051	-0.351726	0.725044	0.816243
MSH4	3.56355	0.151893	0.63673	0.238552	0.811453	0.877061
ASB17	0	NA	NA	NA	NA	NA
LOC101927342	0	NA	NA	NA	NA	NA
ST6GALNAC3	9.19123	-0.257493	0.543071	-0.474142	0.635398	0.744855
ST6GALNAC5	0.990832	-0.675475	0.547442	-1.23387	0.21725	NA
MIR7156	0	NA	NA	NA	NA	NA
HCN1	88.1577	-1.91942	0.335647	-5.71858	1.07e-08	9.29e-08
AK5	4.00663	-0.900673	0.624176	-1.44298	0.149026	0.252799
ZZZ3	3143.3	-0.014602	0.139514	-0.104663	0.916643	0.948232
LCMT2	1070.31	-1.91924	0.136976	-14.0115	1.33e-44	2.36e-42
FAM73A	5209.33	0.313156	0.167843	1.86576	0.062075	0.124437
NEXN-AS1	33.96	-0.561066	0.383669	-1.46237	0.14364	0.245291
NEXN	195.315	-0.148892	0.260682	-0.571165	0.567888	0.689981
LOC100506688	23.2471	-1.91803	0.429167	-4.4692	7.85e-06	4.22e-05
HVCN1	43.5369	-1.9151	0.408809	-4.68458	2.81e-06	1.64e-05
GIPC2	9.5866	1.13865	0.594474	1.91539	0.0554426	0.113353
MGC27382	2.12539	-0.215981	0.565469	-0.38195	0.702499	0.798893
PTGFR	2.51582	-0.424995	0.612218	-0.694189	0.487564	0.620213
IFI44L	0.836081	-0.367475	0.529703	-0.693739	0.487846	NA
IFI44	0.803419	0.973201	0.514597	1.89119	0.0585991	NA
TBX10	23.0035	-1.9115	0.535313	-3.57081	0.000355877	0.00135416
LOC101927412	0.410501	-0.454727	0.383377	-1.18611	0.235579	NA
LOC101927434	0	NA	NA	NA	NA	NA
ADGRL2	8756.9	-0.171683	0.147227	-1.16611	0.243569	0.371561
LINC01361	0	NA	NA	NA	NA	NA
LOC101927587	0.130383	0	0.302198	0	1	NA
MIR548AP	0.114727	0.249609	0.305061	0.818226	0.413228	NA
LOC101927560	0	NA	NA	NA	NA	NA
FAM20A	338.996	-1.9113	0.319148	-5.98876	2.11e-09	2.05e-08
PRKACB	5174.1	-0.0395783	0.137283	-0.288297	0.77312	0.850396
SEC14L5	11.6567	-1.91004	0.528537	-3.61383	0.000301706	0.00116362
UOX	4.25811	1.08431	0.625307	1.73404	0.0829105	0.157613
DNASE2B	0.184016	-0.31672	0.331255	-0.956122	0.339011	NA
RPF1	2939.44	-0.18975	0.174955	-1.08457	0.278114	0.41059
GNG5	6499.53	0.170952	0.149668	1.14221	0.253366	0.382699
MEI4	9.54089	-1.90903	0.578841	-3.29803	0.000973667	0.00335705
CTBS	930.722	0.314801	0.19861	1.58502	0.112962	0.203155
LINC01461	0.671267	-0.460171	0.463385	-0.993064	0.320679	NA
LINC01555	0.251442	0	0.335132	0	1	NA
TYRO3	1530.29	-1.90866	0.185429	-10.2933	7.56e-25	3.65e-23
LPAR3	5.06654	0.769588	0.611165	1.25921	0.207953	0.328831
CSAG4	142.403	-1.90858	0.214813	-8.88484	6.4e-19	1.94e-17
C4orf46	1722.52	-1.90843	0.148163	-12.8806	5.79e-38	7.08e-36
WDR63	2.0984	-0.367982	0.617165	-0.596246	0.551011	0.676236
MIR4423	0.251442	0	0.335132	0	1	NA
SYDE2	625.846	-0.268684	0.172694	-1.55584	0.119747	0.212556
C1orf52	1536.22	-0.112726	0.136243	-0.827386	0.408019	0.545887
MFAP3	2356.53	-1.9081	0.149006	-12.8055	1.53e-37	1.77e-35
FRMD4A	4008.54	-1.90536	0.222158	-8.57662	9.77e-18	2.59e-16
SMPD3	92.6879	-1.90519	0.344724	-5.52669	3.26e-08	2.63e-07
SMIM1	161.761	-1.90379	0.291092	-6.54018	6.14e-11	7.33e-10
ZNHIT6	2418.48	-0.283634	0.181315	-1.56431	0.117744	0.209767
SNRNP25	815.871	-1.90236	0.149645	-12.7125	5.04e-37	5.61e-35
ODF2L	1016.88	0.147447	0.138866	1.06179	0.288329	0.421672
MIR7856	0	NA	NA	NA	NA	NA
CLCA2	0.184016	-0.31672	0.331255	-0.956122	0.339011	NA
CLCA1	0.209975	0.324612	0.335064	0.968806	0.332642	NA
CLCA4	0	NA	NA	NA	NA	NA
CLCA3P	0.19025	-0.0416028	0.335389	-0.124043	0.901281	NA
RAF1	6906.1	-1.90088	0.13739	-13.8356	1.55e-43	2.65e-41
2019-09-15	6212.98	-0.0613514	0.192799	-0.318214	0.750322	0.832986
HS2ST1	7404.1	0.257249	0.142737	1.80225	0.0715055	0.140005
LINC01140	33.6444	-0.654358	0.394325	-1.65944	0.0970278	0.179533
LOC101927844	0.184016	-0.31672	0.331255	-0.956122	0.339011	NA
C1QL4	327.735	-1.90086	0.241193	-7.88107	3.25e-15	6.42e-14
LINC01364	0	NA	NA	NA	NA	NA
PKN2-AS1	0.766625	0.779009	0.510153	1.52701	0.126758	NA
PKN2	9904.82	0.117155	0.163144	0.718113	0.472688	0.606789
TTBK1	57.3407	-1.90009	0.38174	-4.97745	6.44e-07	4.22e-06
LINGO3	2.95014	-1.90001	0.63353	-2.99909	0.00270788	0.00833825
RBMXL1	4837.31	-0.0153228	0.129583	-0.118246	0.905872	0.94134
INPP5A	1762.25	-1.89957	0.127544	-14.8934	3.64e-50	9.54e-48
CDK8	1012.15	-1.8973	0.148463	-12.7796	2.13e-37	2.46e-35
STAC2	20.3291	-1.89545	0.636047	-2.98006	0.00288195	0.00880622
NYNRIN	14.6032	-1.89479	0.535239	-3.54009	0.000399995	0.00150627
LOC100507006	82.9762	-1.89402	0.343085	-5.52056	3.38e-08	2.72e-07
GBP5	30.6203	-0.30017	0.476636	-0.629768	0.528847	0.65682
LOC729930	0	NA	NA	NA	NA	NA
GBP6	0	NA	NA	NA	NA	NA
GBP1P1	0.625631	0.538366	0.458634	1.17385	0.240457	NA
LRRC8B	3133.32	0.0505495	0.200255	0.252425	0.800712	0.869744
FLJ27354	6.83167	0.0204635	0.589806	0.0346953	0.972323	0.983565
NRARP	299.307	-1.89389	0.235904	-8.02824	9.89e-16	2.1e-14
LRRC8D	4155.34	0.156362	0.132788	1.17753	0.238983	0.366247
FAM210B	2007.13	-1.89387	0.145844	-12.9856	1.48e-38	1.95e-36
NFATC4	134.92	-1.8916	0.270965	-6.98099	2.93e-12	4.12e-11
BARHL2	1.15192	-0.780526	0.524929	-1.48692	0.137036	0.236752
LINC00313	98.0054	-1.89014	0.268597	-7.03709	1.96e-12	2.82e-11
HFM1	3.25465	-0.649056	0.636877	-1.01912	0.308145	0.442726
CDC7	2576.61	-0.0393142	0.1362	-0.288651	0.772849	0.850368
QDPR	3582.48	-1.88881	0.168064	-11.2386	2.63e-29	1.71e-27
BRDT	1.54241	-0.858394	0.576702	-1.48845	0.136631	0.23636
EPHX4	335.182	-0.429992	0.240774	-1.78588	0.0741189	0.143876
SETSIP	25.798	0.249863	0.423087	0.590571	0.554808	0.67889
BTBD8	126.592	0.39416	0.21242	1.85556	0.0635158	0.126809
C2orf72	12486.5	-1.88838	0.180263	-10.4757	1.12e-25	5.71e-24
C1orf146	0.785816	-0.158766	0.490144	-0.323916	0.746001	NA
VPS9D1-AS1	1047.59	-1.8879	0.172922	-10.9176	9.49e-28	5.57e-26
RPAP2	1372.96	0.162041	0.198335	0.817007	0.413924	0.551235
GDAP1	1786.39	-1.88708	0.146919	-12.8443	9.26e-38	1.11e-35
FIBCD1	17.6019	-1.88681	0.450407	-4.18912	2.8e-05	0.00013421
RPL5	61161.8	0.312106	0.193701	1.61128	0.10712	0.194614
STXBP1	4697.17	-1.88638	0.128594	-14.6693	1.01e-48	2.44e-46
SNORD21	47.7415	0.359619	0.389429	0.923452	0.355771	0.493681
SNORA66	47.5868	-0.339144	0.403764	-0.839956	0.400933	0.538994
MGAT3	60.0665	-1.88575	0.377693	-4.99282	5.95e-07	3.91e-06
TEX40	13.8804	-1.88562	0.558578	-3.37575	0.000736159	0.00261274
MIXL1	115.212	-1.8836	0.262898	-7.16476	7.79e-13	1.18e-11
AGTR1	2321.01	-1.88132	0.267165	-7.04179	1.9e-12	2.73e-11
DR1	9989.14	0.0971163	0.133383	0.728103	0.466551	0.601001
SLCO3A1	17.2629	-1.88057	0.513745	-3.66052	0.000251706	0.000986629
BCAR3	1410.85	0.143116	0.155361	0.921183	0.356955	0.495075
LOC100129046	201.805	0.0806627	0.177863	0.453511	0.650181	0.757019
MIR760	0.784031	-0.225084	0.496691	-0.453168	0.650428	NA
DNTTIP2	9199.2	0.0329201	0.126967	0.25928	0.795419	0.866144
GZMA	7.02529	-1.8798	0.623962	-3.01269	0.00258944	0.00800693
C1QL1	9008.46	-1.87676	0.157003	-11.9536	6.21e-33	5.1e-31
ZNF594	289.292	-1.87645	0.191378	-9.80491	1.07e-22	4.46e-21
ABCD3	22871.6	0.122751	0.123094	0.997216	0.31866	0.453551
F3	2689.41	-0.0580874	0.155018	-0.374714	0.707873	0.803146
LINC01057	232.38	-0.330751	0.183131	-1.80609	0.0709043	0.138964
MIR378G	0.0920078	-0.234211	0.300577	-0.779204	0.43586	NA
OLFML1	48.3343	-1.87615	0.359231	-5.2227	1.76e-07	1.27e-06
MAGEC3	4.75163	-1.87558	0.635513	-2.95128	0.0031646	0.00958179
SRXN1	4666.76	-1.87519	0.146328	-12.815	1.35e-37	1.58e-35
PCDHGA8	32.9617	-1.87384	0.372808	-5.02628	5e-07	3.34e-06
ZBED6CL	1444.45	-1.87286	0.129645	-14.4461	2.65e-47	5.81e-45
TMEM56-RWDD3	1656.32	-0.138325	0.144721	-0.9558	0.339173	0.476084
LOC101928118	8.14721	0.412991	0.585501	0.705363	0.480584	0.613999
RWDD3	1397.6	-0.0726066	0.184143	-0.394294	0.693364	0.791667
FLJ31662	0	NA	NA	NA	NA	NA
LOC100996635	0	NA	NA	NA	NA	NA
LOC102723661	0	NA	NA	NA	NA	NA
LOC101928241	0	NA	NA	NA	NA	NA
SLC32A1	17.0005	-1.87096	0.562125	-3.32837	0.000873565	0.00304749
ROR1	742.494	-1.87075	0.200095	-9.3493	8.82e-21	3.15e-19
DPYD-AS1	0.90929	-0.211867	0.527685	-0.401503	0.68805	NA
DPYD-AS2	0	NA	NA	NA	NA	NA
MIR137HG	0	NA	NA	NA	NA	NA
MIR2682	0	NA	NA	NA	NA	NA
MIR137	0	NA	NA	NA	NA	NA
LOC729987	0	NA	NA	NA	NA	NA
SNX7	2834.55	0.132706	0.179388	0.739772	0.459438	0.594644
LPPR5	0	NA	NA	NA	NA	NA
LOC100129620	0	NA	NA	NA	NA	NA
LPPR4	0.634911	0.436158	0.457043	0.954304	0.33993	NA
LOC101928270	0	NA	NA	NA	NA	NA
PALMD	0.78142	-0.324032	0.460525	-0.703615	0.481672	NA
MIR548D1	0.251442	0	0.335132	0	1	NA
MIR548AA1	0.251442	0	0.335132	0	1	NA
BCL2	13.5339	-1.86981	0.505707	-3.69742	0.000217804	0.000862906
TFAP2E	117.194	-1.86864	0.274839	-6.79904	1.05e-11	1.38e-10
DSEL	1670.64	-1.86808	0.249416	-7.48981	6.9e-14	1.19e-12
HIAT1	6145.46	-0.251622	0.158913	-1.58339	0.113332	0.203544
PIANP	29.395	-1.86726	0.46481	-4.01726	5.89e-05	0.000261488
LOC102724699	18.4508	-1.86462	0.491021	-3.79744	0.000146197	0.000600081
LRRC39	127.398	0.321548	0.247418	1.29962	0.193733	0.311084
ZNF843	9.70482	-1.8643	0.600794	-3.10306	0.00191529	0.00612376
SLC22A7	22.8091	-1.86389	0.51827	-3.59637	0.000322692	0.00123953
LCMT1	1816.14	-1.86376	0.151792	-12.2783	1.18e-34	1.1e-32
MIR553	1.64977	-0.707314	0.601132	-1.17664	0.239341	0.366598
ALPPL2	5.33573	-1.8636	0.635695	-2.9316	0.00337223	0.0101503
GPR88	1.207	-0.246851	0.535816	-0.460702	0.645013	0.752804
LINC01349	0	NA	NA	NA	NA	NA
VCAM1	11.6144	0.284118	0.529904	0.536169	0.591842	0.710766
SLC9A4	6.69887	-1.86167	0.618176	-3.01155	0.00259917	0.0080333
WASIR2	27.42	-1.86033	0.438374	-4.24371	2.2e-05	0.000107854
DPH5	912.469	-0.167998	0.201257	-0.834742	0.403863	0.541855
LOC103344931	174.522	-1.86023	0.27663	-6.72463	1.76e-11	2.24e-10
LOC101928370	0.154014	0.3016	0.325674	0.92608	0.354404	NA
S1PR1	1.10239	-0.914118	0.554537	-1.64843	0.0992636	0.182807
LINC01307	0	NA	NA	NA	NA	NA
RNU6-31P	0	NA	NA	NA	NA	NA
OLFM3	0	NA	NA	NA	NA	NA
DNAJA1P5	0	NA	NA	NA	NA	NA
FGL2	65.1185	-1.85958	0.366228	-5.07766	3.82e-07	2.6e-06
LOC101928436	0	NA	NA	NA	NA	NA
MPP2	1141.34	-1.85141	0.142596	-12.9836	1.52e-38	1.99e-36
AMY2B	75.1471	0.159401	0.354879	0.449171	0.653308	0.758975
ACTG1P4	0.564751	0	0.419211	0	1	NA
AMY2A	0.557958	-0.294974	0.403253	-0.731486	0.464483	NA
AMY1A	0.519767	0.32018	0.429642	0.745225	0.456136	NA
AMY1C	0.519767	0.32018	0.429642	0.745225	0.456136	NA
AMY1B	0.519767	0.32018	0.429642	0.745225	0.456136	NA
LOC100129138	3.21898	0.538849	0.637051	0.845848	0.397638	0.535607
LOC101928476	0.209975	0.324612	0.335064	0.968806	0.332642	NA
PLXNB3	59.0126	-1.84843	0.443435	-4.16842	3.07e-05	0.000145315
NTNG1	0.209975	0.324612	0.335064	0.968806	0.332642	NA
PRR18	3.20165	-1.84711	0.635148	-2.90815	0.00363575	0.0108582
MIR7852	0	NA	NA	NA	NA	NA
VAV3-AS1	0	NA	NA	NA	NA	NA
ACSBG1	41.1085	-1.84683	0.390616	-4.72798	2.27e-06	1.34e-05
NBPF4	221.791	0.073667	0.221965	0.331886	0.739975	0.826457
NBPF6	188.915	0.0637488	0.205785	0.309783	0.756726	0.837901
EGR1	744.62	-1.8468	0.503299	-3.66938	0.000243136	0.000956233
RNF208	510.748	-1.84655	0.242355	-7.61922	2.55e-14	4.6e-13
PRPF38B	4627.3	-0.23771	0.131432	-1.80861	0.0705109	0.138343
FNDC7	4.01783	-1.22608	0.636289	-1.92693	0.0539885	0.110894
STXBP3	3715.68	-0.105087	0.155011	-0.677934	0.497814	0.629362
AKNAD1	2.79134	0.15426	0.632149	0.244025	0.807211	0.874135
SPATA42	0	NA	NA	NA	NA	NA
ERLIN1	12215	-1.84577	0.125899	-14.6607	1.15e-48	2.73e-46
SYP-AS1	71.7025	-1.84225	0.281491	-6.54462	5.96e-11	7.13e-10
ZNF559	521.167	-1.84043	0.178716	-10.2981	7.19e-25	3.48e-23
MCIDAS	244.966	-1.83981	0.186095	-9.88638	4.77e-23	2.01e-21
RPGR	1432.74	-1.83779	0.208648	-8.80806	1.27e-18	3.73e-17
SCARNA2	7.35221	0.040823	0.585209	0.0697579	0.944386	0.965803
C1orf194	0.661882	-0.0338409	0.439942	-0.0769211	0.938686	NA
KIAA1324	60.0794	-0.179502	0.341744	-0.525254	0.599407	0.716828
CKMT1A	5.8927	-1.83659	0.620137	-2.96159	0.00306054	0.00930345
PLIN5	82.9158	-1.83597	0.340006	-5.39982	6.67e-08	5.13e-07
PSRC1	2819.5	0.285348	0.159213	1.79224	0.0730951	0.142459
MYBPHL	0.56905	0.169597	0.406241	0.417478	0.676329	NA
MRO	2.50637	-1.83533	0.625331	-2.93497	0.00333576	0.0100512
PSMA5	8787.47	0.17965	0.171227	1.0492	0.294088	0.428054
SYPL2	724.303	0.0306056	0.155683	0.196589	0.844149	0.899379
ATXN7L2	724.976	0.0723778	0.178113	0.406359	0.684479	0.784964
PPP1R1C	140.596	-1.83456	0.259584	-7.06731	1.58e-12	2.3e-11
LOC101928336	4.34141	-1.83422	0.633236	-2.89658	0.00377254	0.0112214
GPR61	1.64986	-0.843386	0.613619	-1.37445	0.169304	0.280046
CASS4	9.82929	-1.83125	0.577562	-3.17065	0.00152098	0.00499689
MIR197	1.00666	-1.01987	0.546341	-1.86672	0.0619405	NA
GNAT2	10.2962	-1.02187	0.562617	-1.81627	0.0693288	0.136346
ADORA1	16.2231	-1.83022	0.530297	-3.45132	0.000557858	0.00203048
MBTPS1	3546.07	-1.82918	0.141162	-12.958	2.12e-38	2.76e-36
OTUB2	387.707	-1.82835	0.181097	-10.0959	5.76e-24	2.61e-22
UHMK1	28157.4	-1.82803	0.198304	-9.21832	3.02e-20	1.03e-18
GSTM5	6.16837	-0.0947603	0.593384	-0.159695	0.873122	0.919505
C10orf95	102.762	-1.82781	0.270161	-6.76561	1.33e-11	1.72e-10
ZNF772	178.756	-1.82674	0.235775	-7.74778	9.35e-15	1.76e-13
CSF1	3056.47	0.191498	0.176614	1.08427	0.278244	0.410666
AHCYL1	14797.7	0.210217	0.121455	1.73082	0.0834846	0.158538
GPR119	23.1157	-1.82641	0.454058	-4.02242	5.76e-05	0.000256283
ALX3	59.3461	0.217162	0.330451	0.657167	0.511073	0.641561
LINC01397	0.253934	-0.148551	0.340462	-0.436322	0.662603	NA
UBL4B	0.19456	-0.320819	0.33292	-0.963655	0.335219	NA
SLC6A17	18.8026	0.438149	0.434664	1.00802	0.313447	0.44834
KCNC4-AS1	6.04398	0.218057	0.578801	0.376739	0.706368	0.801981
SLC9A5	433.175	-1.82456	0.258303	-7.06363	1.62e-12	2.36e-11
LOC100507250	9.11693	-1.82261	0.581299	-3.13542	0.0017161	0.00556004
PCDHB14	7.50557	-1.82179	0.618171	-2.94706	0.00320807	0.0097016
FAM3B	8.15117	-1.821	0.586286	-3.10599	0.00189643	0.00607414
LGALS4	14.2663	-1.82058	0.526691	-3.45663	0.000546972	0.00199456
LAMTOR5-AS1	32.7566	0.415373	0.370257	1.12185	0.261926	0.392476
PROK1	0.260765	0	0.336166	0	1	NA
CYMP	0	NA	NA	NA	NA	NA
LOC440602	0	NA	NA	NA	NA	NA
KCNA10	0.973943	0.538141	0.547625	0.982682	0.325764	NA
KCNA2	0.184016	-0.31672	0.331255	-0.956122	0.339011	NA
KCNA3	0.838614	-0.825799	0.482076	-1.713	0.0867118	NA
CD53	1.48067	-0.394336	0.595848	-0.661807	0.508095	0.63903
GCSAML-AS1	4.88193	-1.81934	0.632425	-2.87677	0.00401768	0.011869
DRAM2	1932.81	0.286321	0.165731	1.72763	0.0840543	0.159308
SLC6A19	91.9954	-1.81831	0.34168	-5.32167	1.03e-07	7.68e-07
SPATA3-AS1	26.0642	-1.81816	0.411906	-4.41401	1.01e-05	5.34e-05
CHI3L2	1.47317	0.535244	0.56726	0.94356	0.345395	0.482777
CHIAP2	0	NA	NA	NA	NA	NA
CHIA	0.184016	-0.31672	0.331255	-0.956122	0.339011	NA
PIFO	85.4642	-0.109416	0.228212	-0.479448	0.63162	0.741777
PGCP1	0.0972798	-0.238714	0.301702	-0.791224	0.428813	NA
IL1RAP	7371.7	-1.81742	0.169451	-10.7254	7.74e-27	4.28e-25
CTHRC1	17.3296	-1.81474	0.513576	-3.53353	0.000410046	0.00153831
ATP5F1	4503.11	-0.318414	0.185234	-1.71898	0.0856173	0.16171
C1orf162	2.1449	0.401856	0.623936	0.644066	0.519532	0.648293
TMIGD3	0.310668	0.198645	0.350033	0.567503	0.570372	NA
ADORA3	0.156655	0	0.307369	0	1	NA
LINC01160	2.43119	-0.47201	0.632504	-0.746256	0.455513	0.590522
WISP3	9.29041	-1.81427	0.59996	-3.02398	0.0024947	0.00774523
FGFRL1	6040.84	-1.81414	0.176579	-10.2738	9.25e-25	4.42e-23
KLRG2	21.0451	-1.81222	0.447815	-4.0468	5.19e-05	0.000233409
LOC101928718	63.1666	0.516349	0.294553	1.75299	0.0796031	0.152401
DDX20	1317.73	-0.0284108	0.142037	-0.200024	0.841462	0.897571
KCND3	0.756741	-0.210033	0.493339	-0.425738	0.670299	NA
KCND3-IT1	0	NA	NA	NA	NA	NA
KCND3-AS1	0	NA	NA	NA	NA	NA
LOC643355	0	NA	NA	NA	NA	NA
CTTNBP2NL	1834.96	0.0859451	0.165994	0.517759	0.604626	0.72096
MIR4256	0.593876	0.121113	0.445692	0.271742	0.785821	NA
WNT2B	131.303	-0.0299917	0.215775	-0.138995	0.889454	0.930147
ST7L	529.855	0.0725995	0.135712	0.534953	0.592682	0.711331
CAPZA1	13688.4	0.226035	0.117476	1.9241	0.0543425	0.111459
LDHAL6A	7.94528	-1.81065	0.588367	-3.07742	0.002088	0.00662074
RHOC	11522.4	-0.229628	0.147328	-1.55862	0.119085	0.211627
TTC36	3.80898	-1.80843	0.634614	-2.84965	0.00437679	0.0127784
FAM19A3	3.29269	0.137452	0.636918	0.215808	0.829137	0.889519
LINC01356	23.4495	0.421862	0.474808	0.888489	0.374278	0.512884
SLC16A1	7871.68	0.247916	0.144267	1.71846	0.0857129	0.161875
AKR7A2P1	6.66735	0.717983	0.621463	1.15531	0.247963	0.376603
SLC16A1-AS1	74.5673	-0.0151908	0.288282	-0.0526941	0.957976	0.973954
LOC100996251	5.20891	-0.213098	0.614574	-0.346741	0.728786	0.818283
LRIG2	853.073	-0.154398	0.170005	-0.908199	0.363773	0.501927
LOC643441	0.45891	0.395641	0.360204	1.09838	0.272039	NA
MAGI3	909.316	-0.382702	0.236562	-1.61776	0.105713	0.19248
TMEM106C	3882.99	-1.80747	0.14267	-12.6689	8.79e-37	9.52e-35
MAGI2	82.6512	-1.80682	0.303089	-5.96135	2.5e-09	2.39e-08
AP4B1-AS1	409.463	0.287441	0.166068	1.73087	0.0834754	0.158536
PTPN22	0.583354	-0.411959	0.409075	-1.00705	0.313911	NA
BCL2L15	7.34827	-0.100192	0.581136	-0.172407	0.863118	0.912446
MEST	4032.42	-1.80641	0.136557	-13.2282	6.03e-40	8.59e-38
DCLRE1B	1112.17	-0.232804	0.133995	-1.73741	0.0823147	0.15666
KIAA2022	47.3678	-1.80638	0.434046	-4.16173	3.16e-05	0.000149325
HIPK1	5928.5	-0.339612	0.18932	-1.79385	0.0728366	0.142122
LIN28A	2.72923	-1.80607	0.632582	-2.85507	0.00430268	0.0125897
SYT6	0.226486	-0.33193	0.337325	-0.984004	0.325113	NA
SMIM24	18.8531	-1.80571	0.481333	-3.75147	0.000175802	0.000710912
TPPP	429.325	-1.80373	0.213131	-8.46304	2.61e-17	6.62e-16
DENND2C	718.651	-0.0565712	0.216101	-0.261781	0.79349	0.864868
AMPD1	1.27849	-0.556869	0.556253	-1.00111	0.316775	0.451642
LUCAT1	62.9638	-1.8028	0.320055	-5.63279	1.77e-08	1.49e-07
BEND3	2022.97	-1.80157	0.213948	-8.42061	3.75e-17	9.39e-16
SIKE1	4439.85	0.0861076	0.130914	0.657741	0.510704	0.641288
SYCP1	0.467323	0.171579	0.379349	0.4523	0.651053	NA
TSHB	0	NA	NA	NA	NA	NA
TSPAN2	0.446002	-0.201529	0.374493	-0.538137	0.590483	NA
NGF	0	NA	NA	NA	NA	NA
COLGALT2	25.4701	-1.79866	0.426438	-4.21787	2.47e-05	0.000119689
CASQ2	0.712859	0.206729	0.429921	0.480855	0.63062	NA
NHLH2	0.114727	0.249609	0.305061	0.818226	0.413228	NA
LOC101928995	0.692756	0.283098	0.470363	0.601871	0.54726	NA
LOC101928977	2.56314	0.390504	0.609326	0.640878	0.521602	0.650232
HOXA2	25.829	-1.79824	0.446668	-4.0259	5.68e-05	0.000253029
TMPRSS2	1222.66	-1.79815	0.167681	-10.7237	7.88e-27	4.35e-25
SDR42E1	661.856	-1.79591	0.140565	-12.7764	2.22e-37	2.54e-35
FBXO6	953.603	-1.79477	0.150778	-11.9034	1.14e-32	9.1e-31
LOC101929023	0.919595	0.241082	0.505536	0.476883	0.633445	NA
CD58	732.025	-0.0306988	0.166225	-0.184682	0.853478	0.905687
IGSF3	9603.25	0.298478	0.191646	1.55744	0.119366	0.212084
MIR320B1	0	NA	NA	NA	NA	NA
C1orf137	0.324702	0.36683	0.350651	1.04614	0.295497	NA
CD2	10.2365	-0.736058	0.538626	-1.36655	0.171767	0.283228
PTGFRN	10099.6	0.0558778	0.138434	0.40364	0.686477	0.786597
FAF1	2641.59	-1.79385	0.157743	-11.3719	5.77e-30	3.94e-28
FZD3	1290.91	-1.79126	0.14645	-12.2312	2.12e-34	1.94e-32
IGF2	90.2895	-1.78996	0.259828	-6.88903	5.62e-12	7.62e-11
MIR942	0.251294	0.0814093	0.347264	0.23443	0.814651	NA
RARB	548.016	-1.78996	0.171946	-10.41	2.23e-25	1.12e-23
PDE2A	25.9186	-1.78751	0.452919	-3.94664	7.93e-05	0.000343113
LINC01525	0	NA	NA	NA	NA	NA
MAN1A2	2605.48	0.0608355	0.195961	0.310447	0.756221	0.837668
LOC100996263	0	NA	NA	NA	NA	NA
LRRC37A8P	19.7403	-1.78664	0.453299	-3.94142	8.1e-05	0.000350376
KIRREL2	39.3641	-1.78661	0.401059	-4.45474	8.4e-06	4.49e-05
PIK3CG	31.356	-1.78596	0.390773	-4.57034	4.87e-06	2.72e-05
MTL5	233.484	-1.78289	0.232334	-7.67385	1.67e-14	3.07e-13
CT55	44.8615	-1.78065	0.409894	-4.34417	1.4e-05	7.15e-05
TCF24	25.2721	-1.78052	0.430002	-4.14073	3.46e-05	0.000162366
WARS2-IT1	0.251442	0	0.335132	0	1	NA
RFC5	3101.28	-1.78024	0.155278	-11.4649	1.98e-30	1.42e-28
HAO2	0	NA	NA	NA	NA	NA
HAO2-IT1	0	NA	NA	NA	NA	NA
HSD3B2	0.0972798	-0.238714	0.301702	-0.791224	0.428813	NA
HSD3B1	0	NA	NA	NA	NA	NA
HSD3BP4	0.125721	0	0.301155	0	1	NA
LINC00622	1.16355	-0.03472	0.562563	-0.0617175	0.950788	0.969863
FAM86B1	130.53	-1.78024	0.236956	-7.51295	5.78e-14	9.98e-13
PHGDH	10929.8	0.451937	0.233323	1.93696	0.0527504	0.108775
HMGCS2	206.581	-0.190921	0.263064	-0.725757	0.467988	0.602304
REG4	4.7906	-1.12453	0.624474	-1.80076	0.0717405	0.140368
NBPF7	0	NA	NA	NA	NA	NA
ADAM30	0	NA	NA	NA	NA	NA
NOTCH2	1998.87	-0.215197	0.235639	-0.913251	0.361111	0.499456
KCNG1	2.80485	-1.78019	0.631418	-2.81935	0.00481205	0.0138764
HIST2H2BA	0	NA	NA	NA	NA	NA
FCGR1B	0.226486	-0.33193	0.337325	-0.984004	0.325113	NA
SRGAP2-AS1	0.987547	-0.249404	0.495627	-0.503209	0.614817	NA
KRTAP4-8	3.09118	-1.77848	0.634658	-2.80226	0.0050746	0.0145472
SRGAP2D	3392.24	-0.0968941	0.14742	-0.657268	0.511009	0.641521
KLHL6	6.03543	-1.7775	0.613124	-2.89908	0.00374259	0.0111422
INS-IGF2	86.7448	-1.77633	0.258134	-6.88142	5.93e-12	8.02e-11
LOC102723769	35.6153	-0.475246	0.338698	-1.40316	0.16057	0.268339
MIR6077	1.57316	-0.466161	0.587247	-0.793807	0.427308	0.564271
RNU1-13P	2.9521	-0.0939598	0.632014	-0.148667	0.881816	0.925497
ZNF132	119.181	-1.77593	0.253329	-7.01037	2.38e-12	3.37e-11
LINC01138	211.809	-0.386472	0.206036	-1.87575	0.0606895	0.122139
PPIAL4G	7.9752	-0.175755	0.566901	-0.310027	0.75654	0.837835
CPSF4L	110.262	-1.77538	0.288643	-6.15077	7.71e-10	7.94e-09
CETN3	1253.72	-1.77458	0.241416	-7.3507	1.97e-13	3.2e-12
NBPF20	826.46	-0.191569	0.151423	-1.26512	0.205827	0.326324
RAP1GAP	1929.5	-1.77432	0.155943	-11.378	5.38e-30	3.68e-28
PDCL2	18.7342	-1.77334	0.473002	-3.74912	0.000177459	0.00071645
PPIAL4A	18.5731	0.258471	0.430973	0.599739	0.54868	0.674346
PPIAL4C	18.5731	0.258471	0.430973	0.599739	0.54868	0.674346
PFN1P2	36.8597	0.176462	0.422859	0.417307	0.676454	0.778244
NBPF9	3729.74	0.0123222	0.122318	0.100739	0.919758	0.950355
NBPF8	3484.56	-0.0637388	0.125107	-0.509474	0.61042	0.72483
LOC653513	1.95812	0.217712	0.623751	0.349037	0.727061	0.817452
SIGLEC16	8.25883	-1.77155	0.592885	-2.98801	0.002808	0.00861185
C3orf14	583.44	-1.77133	0.20554	-8.61794	6.82e-18	1.84e-16
COBLL1	1259.6	-1.77031	0.158437	-11.1736	5.49e-29	3.51e-27
NBPF25P	2569.86	0.018436	0.136243	0.135317	0.892361	0.932496
NBPF10	911.493	-0.0711486	0.174172	-0.408496	0.68291	0.783591
RTEL1-TNFRSF6B	1441.39	-1.76914	0.154294	-11.4661	1.95e-30	1.4e-28
HFE2	11.4004	-0.338001	0.543846	-0.6215	0.534271	0.661637
RTEL1	1410.49	-1.76884	0.15497	-11.4141	3.56e-30	2.5e-28
MIR135A1	8.5092	-1.76854	0.557468	-3.17244	0.00151164	0.00497193
ERVMER34-1	196.65	-1.76713	0.209008	-8.45486	2.79e-17	7.09e-16
SCML4	4.20919	-1.76566	0.633606	-2.78668	0.00532511	0.0151737
RBM8A	9908.22	-0.213122	0.156885	-1.35846	0.174316	0.286507
MYBPC2	26.2111	-1.7653	0.424456	-4.15897	3.2e-05	0.000151067
CCDC109B	1216.08	-1.76407	0.159995	-11.0258	2.87e-28	1.74e-26
DAND5	12.357	-1.76175	0.521123	-3.38067	0.000723095	0.00257095
RAD18	2894.4	-1.76052	0.139903	-12.5839	2.59e-36	2.63e-34
LINC00624	9.41051	-1.75988	0.575876	-3.05601	0.00224307	0.00704742
MIR6736	5.34499	-0.146541	0.614617	-0.238427	0.81155	0.877118
ITGB7	109.066	-1.75944	0.271486	-6.48075	9.13e-11	1.06e-09
POLR3C	3444.76	0.174434	0.144087	1.21061	0.226044	0.350241
PARK7	15684.8	-1.75931	0.167772	-10.4863	9.99e-26	5.16e-24
CD160	15.784	-0.430204	0.487832	-0.881868	0.377848	0.516371
FES	209.544	-1.75875	0.275055	-6.39415	1.61e-10	1.81e-09
TMEM145	525.402	-1.75785	0.266418	-6.59808	4.17e-11	5.1e-10
ATP4A	10.3521	-1.75757	0.569298	-3.08726	0.0020201	0.00642282
NBPF11	1885.61	0.0975009	0.142507	0.684185	0.493858	0.626108
NBPF12	1357.54	-0.10544	0.208733	-0.505146	0.613456	0.727389
LOC728989	5.24769	0.225214	0.598782	0.37612	0.706828	0.802315
RNVU1-8	1.25386	0.545858	0.521335	1.04704	0.295081	0.429154
NBPF13P	0.114727	0.249609	0.305061	0.818226	0.413228	NA
PRKAB2	4602.25	-0.264391	0.164495	-1.60729	0.107991	0.195751
ZNF512B	2749.96	-1.75737	0.146988	-11.9559	6.05e-33	4.98e-31
FHOD3	36.8466	-1.75662	0.359009	-4.89299	9.93e-07	6.28e-06
PAXIP1-AS1	332.547	-1.75562	0.223946	-7.83946	4.52e-15	8.78e-14
CYP2J2	88.5357	-1.75514	0.260273	-6.74347	1.55e-11	1.98e-10
BCL9	3854.02	0.335279	0.239088	1.40232	0.160819	0.268621
ADRA2B	39.7394	-1.7536	0.406172	-4.31739	1.58e-05	7.97e-05
GJA5	0.87637	-0.62734	0.496282	-1.26408	0.206201	NA
GJA8	0	NA	NA	NA	NA	NA
CLIC2	52.5967	-1.75301	0.34061	-5.14667	2.65e-07	1.85e-06
LOC101927468	0.45594	0.00149809	0.375962	0.00398468	0.996821	NA
MIR5087	0.457425	0.203438	0.377747	0.538557	0.590193	NA
RNVU1-19	3.33469	-0.53719	0.635105	-0.845829	0.397648	0.535607
PPIAL4F	26.6949	0.16268	0.410762	0.396046	0.692071	0.790916
PPIAL4D	26.6949	0.16268	0.410762	0.396046	0.692071	0.790916
PPIAL4E	26.6949	0.16268	0.410762	0.396046	0.692071	0.790916
NBPF14	1004.97	0.0130211	0.151622	0.0858783	0.931563	0.958146
NBPF15	2047.58	0.31583	0.169869	1.85925	0.0629911	0.125995
ABCC8	124.172	-1.75275	0.316367	-5.54025	3.02e-08	2.45e-07
LOC645166	266.836	-1.75251	0.186193	-9.41233	4.85e-21	1.77e-19
VAT1L	242.747	-1.75146	0.241514	-7.25201	4.11e-13	6.41e-12
LOC388692	184.981	-0.250661	0.210335	-1.19172	0.23337	0.359108
FAM231D	165.269	-0.277536	0.228229	-1.21604	0.223971	0.347997
FCGR1C	0	NA	NA	NA	NA	NA
LOC103091866	177.485	-0.321737	0.20154	-1.5964	0.1104	0.199429
RNVU1-20	2.508	-0.732798	0.616234	-1.18916	0.234378	0.360437
HIST2H2BF	5.71041	-0.0288271	0.596399	-0.0483352	0.961449	0.975843
FCGR1A	0.674422	-0.345876	0.459135	-0.75332	0.451257	NA
HIST2H3D	3.78842	-0.0130899	0.621458	-0.0210633	0.983195	0.990951
CETN1	7.79055	-1.75046	0.611542	-2.86238	0.00420478	0.0123358
ARHGDIA	18438.2	-1.74837	0.179707	-9.72898	2.27e-22	9.15e-21
HIST2H3C	18.8783	0.237315	0.447275	0.530579	0.59571	0.713607
HIST2H3A	18.8783	0.237315	0.447275	0.530579	0.59571	0.713607
SFRP2	1.76217	-1.7472	0.601032	-2.907	0.0036491	0.0108932
AP3S1	3323.87	-1.7467	0.190824	-9.15344	5.51e-20	1.84e-18
P2RY2	363.52	-1.74432	0.180445	-9.66681	4.17e-22	1.64e-20
ARHGEF33	62.649	-1.7439	0.330131	-5.28245	1.27e-07	9.36e-07
IGLON5	44.3147	-1.74386	0.425199	-4.10127	4.11e-05	0.000188791
HIST2H2AB	3.81795	-0.114303	0.627389	-0.182188	0.855435	0.907042
MROH2A	7.45328	-1.74323	0.601217	-2.8995	0.0037376	0.011129
SV2A	486.782	-0.0989624	0.288171	-0.343415	0.731286	0.819889
SF3B4	11518.5	0.0159132	0.130367	0.122064	0.902848	0.93952
RUNDC3A-AS1	123.455	-1.74155	0.309408	-5.62865	1.82e-08	1.52e-07
RBPJL	3.77975	-1.74083	0.635881	-2.73767	0.00618767	0.017288
VPS45	2731.84	0.154472	0.119293	1.2949	0.195356	0.313072
PLEKHO1	1608.84	0.261597	0.220568	1.18602	0.235616	0.362006
FZD6	38.6808	-1.73977	0.364774	-4.76945	1.85e-06	1.11e-05
CA14	19.5899	-0.65269	0.433742	-1.50479	0.132378	0.230644
APH1A	14956.3	0.0919929	0.128992	0.713169	0.475741	0.609674
C1orf54	12.2102	-0.0413901	0.490326	-0.0844135	0.932728	0.958849
CIART	6.6816	-0.629876	0.592711	-1.0627	0.287916	0.421316
MRPS21	3850.3	0.0707392	0.136629	0.517748	0.604634	0.72096
PRPF3	6883.08	0.234733	0.135599	1.73108	0.083437	0.158478
FIGNL1	2040.27	-1.73942	0.145742	-11.9349	7.79e-33	6.33e-31
TARS2	2653.06	0.244774	0.134847	1.81519	0.069494	0.136657
MIR6878	4.65688	0.811071	0.615668	1.31738	0.18771	0.303861
C6orf223	36.9028	-1.73936	0.413885	-4.20253	2.64e-05	0.000127324
ARHGAP29	19334.2	-1.73934	0.137617	-12.639	1.29e-36	1.37e-34
FAM201A	68.3601	-1.73926	0.306409	-5.67627	1.38e-08	1.17e-07
MIR4257	3.57986	0.236131	0.632808	0.373148	0.709038	0.804037
ADAMTSL4-AS1	12.3762	0.962342	0.507637	1.89573	0.0579959	0.117764
CYP4F11	52.0098	-1.73847	0.316239	-5.49734	3.86e-08	3.07e-07
TMEM151B	10.8829	-1.73761	0.564737	-3.07685	0.00209199	0.00663022
MPV17L	1272.2	-1.73747	0.224157	-7.75113	9.11e-15	1.72e-13
HORMAD1	364.321	0.0444467	0.209477	0.212179	0.831967	0.890828
STK33	10.3801	-1.73741	0.544925	-3.18834	0.00143092	0.00473754
CTSK	323.939	-0.0124915	0.230676	-0.0541516	0.956814	0.973344
ARNT	5603.42	0.263045	0.152994	1.71931	0.0855572	0.161627
SALL1	9.45266	-1.73585	0.551564	-3.14715	0.00164871	0.00537314
CERS2	26053.2	0.177385	0.131626	1.34764	0.177774	0.291086
ESPNL	17.7899	-1.73561	0.48213	-3.59988	0.000318359	0.00122453
POMGNT2	2168.5	-1.73534	0.120484	-14.403	4.95e-47	1.04e-44
PRUNE	4806.59	0.186782	0.119538	1.56253	0.118162	0.210274
BNIPL	30.6922	-0.710436	0.43438	-1.63552	0.101941	0.186891
CECR6	2.96724	-1.73285	0.63417	-2.73246	0.0062863	0.0175365
CDC42SE1	8615.04	0.120278	0.148067	0.812319	0.416608	0.553906
GP1BB	12.0145	-1.73179	0.525866	-3.29321	0.000990491	0.00340975
MAGEB2	257.801	-1.73115	0.209353	-8.26903	1.35e-16	3.2e-15
SEMA6C	820.486	-0.149111	0.166644	-0.894787	0.370901	0.509146
CCDC137	5354.08	-1.73083	0.141294	-12.2498	1.68e-34	1.55e-32
TNFAIP8L2	8.29885	-0.455189	0.593288	-0.76723	0.442945	0.579172
ZCCHC18	9.88452	-1.7308	0.55165	-3.1375	0.00170395	0.00552605
KCNK5	14.0696	-1.73016	0.521452	-3.31797	0.000906757	0.00314759
LINC00638	111.533	-1.72666	0.264749	-6.52189	6.94e-11	8.19e-10
P2RY6	75.4296	-1.72651	0.32241	-5.35501	8.56e-08	6.47e-07
FHOD1	1574.53	-1.72572	0.183218	-9.41894	4.56e-21	1.68e-19
SAA2-SAA4	211.661	-1.72563	0.342506	-5.03826	4.7e-07	3.15e-06
B3GNT5	45.7621	-1.72426	0.412404	-4.18099	2.9e-05	0.000138501
ESAM	70.7968	-1.72344	0.361278	-4.7704	1.84e-06	1.11e-05
RFX5	3731.85	0.105652	0.122356	0.863483	0.387872	0.526137
GBAT2	40.1408	-0.0632519	0.309227	-0.204548	0.837925	0.895129
LOC101926941	8.65576	-1.72081	0.579933	-2.96725	0.00300476	0.00915065
PSMB4	20922.1	0.0780604	0.155049	0.503457	0.614643	0.728536
POGZ	4917.16	0.188926	0.158637	1.19093	0.233682	0.359493
RSAD1	3149.32	-1.71655	0.170749	-10.053	8.91e-24	3.97e-22
GPR153	1337.75	-1.71624	0.187778	-9.13974	6.26e-20	2.07e-18
MIR554	1.14339	0.147953	0.515958	0.286753	0.774301	0.851198
SNX27	6913.41	0.158162	0.151936	1.04098	0.297886	0.432067
CELF3	6.2594	-0.291989	0.601607	-0.485349	0.627429	0.738291
RIIAD1	0.19456	-0.320819	0.33292	-0.963655	0.335219	NA
MRPL9	4585.8	-0.111997	0.161739	-0.692454	0.488652	0.62136
OAZ3	1212.36	-0.0702317	0.137881	-0.509363	0.610498	0.72483
TDRKH	1745.86	0.141162	0.119104	1.18519	0.235941	0.362392
LINGO4	0	NA	NA	NA	NA	NA
SNORA12	7.26078	-1.7156	0.580497	-2.9554	0.00312262	0.00946473
C2CD4D	0.358045	-0.116338	0.352726	-0.329826	0.741531	NA
LOC100132111	1.86919	0.0307599	0.560598	0.0548698	0.956242	0.973036
THEM5	2.30411	-0.138658	0.627626	-0.220925	0.825151	0.886913
NOC2L	15394.2	-1.71508	0.130711	-13.1212	2.49e-39	3.42e-37
S100A10	19309.7	0.119215	0.126135	0.945137	0.344589	0.481989
NBPF18P	1.72923	-0.0673956	0.591313	-0.113976	0.909257	0.943529
ZBTB38	5850.21	-1.71493	0.190828	-8.98677	2.55e-19	7.95e-18
LOC100131107	0.260765	0	0.336166	0	1	NA
TCHHL1	0	NA	NA	NA	NA	NA
PP7080	784.937	-1.71285	0.14825	-11.5538	7.06e-31	5.14e-29
RPTN	0	NA	NA	NA	NA	NA
HRNR	0.279735	0.208409	0.34782	0.599185	0.549049	NA
FLG	0.641265	-0.0571214	0.436785	-0.130777	0.895952	NA
FLG-AS1	0.154014	0.3016	0.325674	0.92608	0.354404	NA
FLG2	0.209975	0.324612	0.335064	0.968806	0.332642	NA
CRNN	0	NA	NA	NA	NA	NA
LCE5A	0	NA	NA	NA	NA	NA
CRCT1	16.4409	-0.34401	0.51298	-0.670611	0.502468	0.633552
LCE3E	0	NA	NA	NA	NA	NA
LCE3D	0	NA	NA	NA	NA	NA
LCE3C	0	NA	NA	NA	NA	NA
LCE3B	0	NA	NA	NA	NA	NA
LCE3A	0.19456	-0.320819	0.33292	-0.963655	0.335219	NA
LCE2D	0	NA	NA	NA	NA	NA
LCE2C	0	NA	NA	NA	NA	NA
LCE2B	0	NA	NA	NA	NA	NA
LCE2A	0.209975	0.324612	0.335064	0.968806	0.332642	NA
LCE4A	0	NA	NA	NA	NA	NA
C1orf68	0	NA	NA	NA	NA	NA
KPRP	0.226486	-0.33193	0.337325	-0.984004	0.325113	NA
LCE1F	0	NA	NA	NA	NA	NA
LCE1E	0	NA	NA	NA	NA	NA
LCE1D	0	NA	NA	NA	NA	NA
LCE1C	0	NA	NA	NA	NA	NA
LCE1B	0	NA	NA	NA	NA	NA
LCE1A	0	NA	NA	NA	NA	NA
LCE6A	0	NA	NA	NA	NA	NA
SMCP	0.229455	0.331132	0.337605	0.980827	0.326678	NA
IVL	0	NA	NA	NA	NA	NA
SPRR4	0	NA	NA	NA	NA	NA
SPRR1A	0.19456	-0.320819	0.33292	-0.963655	0.335219	NA
SPRR3	2.24009	0.200722	0.627809	0.319719	0.749181	0.832322
SPRR1B	1.29848	0.28433	0.534157	0.532297	0.594521	0.712481
SPRR2D	0.313309	0	0.341218	0	1	NA
SPRR2A	0	NA	NA	NA	NA	NA
SPRR2B	0.209975	0.324612	0.335064	0.968806	0.332642	NA
SPRR2E	0	NA	NA	NA	NA	NA
SPRR2F	0	NA	NA	NA	NA	NA
SPRR2C	0	NA	NA	NA	NA	NA
SPRR2G	0	NA	NA	NA	NA	NA
LOC101928009	0	NA	NA	NA	NA	NA
LELP1	0	NA	NA	NA	NA	NA
PRR9	0	NA	NA	NA	NA	NA
LOR	0	NA	NA	NA	NA	NA
PGLYRP3	0.229455	0.331132	0.337605	0.980827	0.326678	NA
PGLYRP4	0.313309	0	0.341218	0	1	NA
LCN15	108.564	-1.71258	0.282305	-6.06643	1.31e-09	1.3e-08
S100A12	0	NA	NA	NA	NA	NA
S100A8	17.468	0.42063	0.562958	0.747179	0.454955	0.589953
S100A7A	0	NA	NA	NA	NA	NA
S100A7L2	0	NA	NA	NA	NA	NA
S100A7	0	NA	NA	NA	NA	NA
S100A6	6.40171	1.00421	0.601101	1.67061	0.0947987	0.176426
S100A5	3.21457	-0.547813	0.633601	-0.864603	0.387257	0.525564
NPAS1	1175.79	-1.71201	0.394242	-4.34253	1.41e-05	7.2e-05
PRPH2	50.388	-1.71158	0.383158	-4.46702	7.93e-06	4.26e-05
TMEM141	7697.54	-1.7114	0.218066	-7.84812	4.22e-15	8.23e-14
S100A2	31.1415	0.236713	0.35307	0.670443	0.502576	0.633595
S100A16	23334.7	0.182982	0.170329	1.07429	0.282693	0.415361
ZNF648	3.37394	-1.7107	0.635444	-2.69213	0.00709964	0.0195105
NEK7	2579.23	-1.70864	0.165062	-10.3515	4.12e-25	2.04e-23
S100A1	73.6433	0.58577	0.350642	1.67057	0.0948074	0.176426
CHTOP	5731.28	-0.0213148	0.142024	-0.150079	0.880703	0.924779
SNAPIN	2323.43	-0.212217	0.123196	-1.7226	0.0849611	0.160668
ILF2	18695.4	0.0519389	0.13655	0.380367	0.703673	0.799773
VGLL2	8.93944	-1.70829	0.553397	-3.08693	0.00202238	0.00642905
MIR8083	0.310238	-0.120526	0.365632	-0.329638	0.741674	NA
INTS3	5108.46	0.0138452	0.186438	0.0742616	0.940802	0.963819
SLC27A3	775.739	0.0338449	0.245171	0.138046	0.890204	0.930687
LOC343052	0.114727	0.249609	0.305061	0.818226	0.413228	NA
VAX1	746.336	-1.70609	0.15409	-11.072	1.71e-28	1.06e-26
C3orf80	6.84614	-1.70456	0.615882	-2.76768	0.00564567	0.0159798
ITIH1	293.815	-1.70381	0.253123	-6.73113	1.68e-11	2.15e-10
PVRL1	2439.07	-1.70315	0.142539	-11.9487	6.6e-33	5.39e-31
MIR6737	54.8002	0.482853	0.286064	1.68792	0.0914268	0.171238
CREB3L4	744.708	0.0747958	0.161245	0.463865	0.642745	0.751037
JTB	8360.92	-0.0469558	0.169392	-0.277202	0.781625	0.856632
CLEC2L	14.1424	-1.70235	0.572356	-2.97429	0.00293671	0.00895846
RPS27	19960.4	-0.133221	0.159331	-0.836127	0.403084	0.541028
NUP210L	2.7908	-0.443075	0.636902	-0.695672	0.486634	0.619386
CDH11	8.75269	-1.70222	0.554039	-3.07239	0.00212356	0.00671959
MIR190B	0	NA	NA	NA	NA	NA
C1orf189	1.24261	-0.039713	0.542404	-0.0732167	0.941634	0.964324
SYT15	108.271	-1.7009	0.283388	-6.00203	1.95e-09	1.89e-08
LINC01485	8.19407	-1.70039	0.551996	-3.08044	0.00206694	0.00656022
RASD2	6.67417	-1.69955	0.584361	-2.90839	0.00363293	0.0108531
AQP10	7.48861	-0.85906	0.583958	-1.4711	0.141265	0.242147
IQCA1	3.15734	-1.69801	0.63428	-2.67706	0.00742719	0.0203071
TMC1	5.99632	-1.6966	0.60251	-2.81588	0.00486436	0.014007
ARC	14.5502	-1.69589	0.541792	-3.13015	0.00174719	0.0056534
TDRD10	8.67389	0.689983	0.588314	1.17282	0.24087	0.368346
TAGLN3	1.67016	-1.69317	0.597392	-2.83426	0.00459314	0.0133203
CNTF	134.628	-1.69308	0.281734	-6.00952	1.86e-09	1.81e-08
EPHB6	523.34	-1.69186	0.229961	-7.35716	1.88e-13	3.05e-12
CAMKV	107.656	-1.69112	0.284586	-5.9424	2.81e-09	2.66e-08
SOX18	90.1151	-1.69061	0.285781	-5.91577	3.3e-09	3.1e-08
EVA1C	189.211	-1.69046	0.293496	-5.75973	8.42e-09	7.43e-08
ZNF491	4.46311	-1.69029	0.631467	-2.67677	0.00743367	0.020322
INTS2	2948.36	-1.68919	0.185812	-9.09086	9.83e-20	3.19e-18
SHC1	28926.9	0.0434738	0.162996	0.266717	0.789687	0.862043
PRRT4	12.69	-1.68848	0.540177	-3.12579	0.0017733	0.00572487
MIR4258	36.4348	0.541524	0.461892	1.17241	0.241034	0.368512
TIRAP	1393.7	-1.68831	0.184729	-9.13941	6.28e-20	2.08e-18
LENEP	3.12725	-0.241009	0.632106	-0.381279	0.702996	0.799171
LINC00967	3.8769	-1.68757	0.635389	-2.65596	0.00790826	0.0214751
DIRC2	1534.38	-1.68735	0.134455	-12.5495	4e-36	4.01e-34
FRRS1	1941.29	-1.68723	0.213024	-7.92037	2.37e-15	4.77e-14
LOC100505666	323.683	0.0651723	0.206001	0.316368	0.751723	0.834076
ZNF890P	31.3605	-1.68705	0.378869	-4.45286	8.47e-06	4.53e-05
LOC102724312	64.6548	-1.68571	0.29601	-5.69478	1.24e-08	1.06e-07
TMEM26-AS1	6.05072	-1.68429	0.607319	-2.77332	0.0055488	0.0157458
ILDR1	5.51136	-1.68407	0.618638	-2.72222	0.00648452	0.018013
C17orf104	2943.08	-1.68297	0.207842	-8.09733	5.62e-16	1.23e-14
HOXA10-AS	179.474	-1.68119	0.239626	-7.01589	2.28e-12	3.25e-11
KRTCAP2	4183.77	0.265493	0.146523	1.81196	0.0699928	0.137448
TRIM46	187.118	-0.284622	0.289978	-0.981528	0.326333	0.462227
MUC1	382.178	-0.222984	0.268861	-0.829368	0.406896	0.544861
MIR92B	0.374265	-0.251431	0.392909	-0.639921	0.522224	NA
THBS3	947.367	0.297479	0.156428	1.9017	0.0572098	0.116429
MIR675	63.2046	-1.68024	0.384234	-4.37297	1.23e-05	6.35e-05
C5orf60	5.68264	-1.68018	0.616419	-2.72571	0.00641628	0.0178492
FBLN7	5.45485	-1.67992	0.615999	-2.72714	0.00638856	0.0177894
TENM1	68.8963	-1.67768	0.410986	-4.08208	4.46e-05	0.000203531
SCAMP3	11915.9	0.199933	0.127585	1.56706	0.117101	0.208901
CLK2	4281.67	0.214145	0.144511	1.48185	0.13838	0.238432
LRRC26	12.7636	-1.67573	0.530494	-3.15882	0.00158411	0.00518295
PKLR	1432.69	0.24019	0.222423	1.07988	0.280195	0.412592
FDPS	16493.8	0.105574	0.193783	0.544806	0.585887	0.705102
RUSC1-AS1	2465.64	0.0837484	0.226114	0.370382	0.711098	0.80573
RUSC1	8325.34	-0.128107	0.124689	-1.02741	0.304229	0.438143
ASH1L	3566.47	-0.170824	0.232895	-0.733483	0.463264	0.598094
MIR555	58.4105	-0.252573	0.363474	-0.694884	0.487128	0.619777
POU5F1P4	0.712859	0.206729	0.429921	0.480855	0.63062	NA
ASH1L-AS1	165.582	-0.0314795	0.249975	-0.125931	0.899787	0.937546
ITPKB	5.84327	-1.67501	0.594203	-2.81892	0.00481854	0.0138911
AP4S1	193.743	-1.67346	0.215489	-7.76588	8.11e-15	1.53e-13
YY1AP1	5763.33	0.0404518	0.113853	0.3553	0.722365	0.814101
FKBP14	3746.17	-1.67289	0.139198	-12.0181	2.85e-33	2.4e-31
LINC00562	20.2489	-1.6727	0.44766	-3.73653	0.000186575	0.000749309
SBSPON	5.56522	-1.67229	0.623652	-2.68145	0.00733041	0.0200673
LOC101929144	1.66309	-1.67038	0.595652	-2.80428	0.00504287	0.0144604
KIAA0907	3140.78	-0.138124	0.145646	-0.948352	0.34295	0.480135
SNORA80E	3.04356	-0.208777	0.623441	-0.334878	0.737717	0.824641
SCARNA4	3.20093	-0.530735	0.636085	-0.834377	0.404069	0.542092
SERINC2	6070.03	-1.67019	0.15578	-10.7215	8.07e-27	4.44e-25
ARHGAP25	3.80189	-1.66889	0.634133	-2.63176	0.00849441	0.0228437
TGM2	17769	-1.66753	0.141904	-11.7511	6.97e-32	5.38e-30
SARDH	589.281	-1.66682	0.241114	-6.913	4.75e-12	6.49e-11
UBQLN4	10023.2	-0.184642	0.129957	-1.42079	0.155377	0.261371
ZNF671	114.67	-1.66682	0.237485	-7.01863	2.24e-12	3.19e-11
RAB25	8.20494	0.559144	0.589081	0.94918	0.342529	0.479714
MEX3A	1205.17	-0.0884922	0.144339	-0.613087	0.539819	0.667183
HOXA10	376.119	-1.66545	0.217095	-7.67153	1.7e-14	3.12e-13
SEMA4A	140.793	-0.0800064	0.263671	-0.303432	0.761561	0.841292
TNFRSF6B	102.743	-1.6653	0.287037	-5.80169	6.56e-09	5.89e-08
PMF1	2757.55	-0.0077153	0.176181	-0.0437919	0.96507	0.978522
PMF1-BGLAP	1878.68	-0.0294843	0.172566	-0.170859	0.864335	0.913319
IMPAD1	5916.63	-1.66341	0.131865	-12.6145	1.76e-36	1.83e-34
MCOLN2	13.9852	-1.66295	0.513254	-3.24	0.00119529	0.00402236
MTFP1	2179.71	-1.66159	0.172344	-9.64115	5.36e-22	2.09e-20
HSFX1	22.1633	-1.66092	0.433054	-3.83537	0.000125375	0.000520728
LOC100130744	428.535	-1.66056	0.176132	-9.42792	4.18e-21	1.54e-19
VHLL	0.184016	-0.31672	0.331255	-0.956122	0.339011	NA
CCT3	48348.3	-0.0669331	0.14176	-0.472158	0.636814	0.7459
HSFX2	22.0376	-1.65984	0.434111	-3.82354	0.000131551	0.000544336
RIPPLY2	276.783	-1.65791	0.246897	-6.715	1.88e-11	2.39e-10
C1orf61	5.87309	0.72467	0.623233	1.16276	0.244927	0.373205
MIR9-1	0	NA	NA	NA	NA	NA
MEF2D	7726.92	0.121408	0.173024	0.701685	0.482875	0.616216
IQGAP3	5704.84	-0.108465	0.247228	-0.438725	0.660861	0.765697
TTC24	3.85561	-0.664456	0.632098	-1.05119	0.293171	0.427124
LINC00992	6.31262	-1.65651	0.58735	-2.82031	0.0047977	0.0138431
GPATCH4	3171.89	0.323474	0.234266	1.3808	0.167342	0.277423
HAPLN2	7.92044	-1.04778	0.576815	-1.81649	0.0692955	0.13632
TSHZ3	1.5887	-1.65637	0.595027	-2.78369	0.00537449	0.0153013
MAPKAP1	4405.04	-1.65535	0.141973	-11.6596	2.05e-31	1.54e-29
TNFSF15	34.6449	-1.65197	0.371059	-4.45205	8.51e-06	4.54e-05
GFY	134.893	-1.65187	0.278009	-5.94179	2.82e-09	2.67e-08
RPS6KA3	29730.2	-1.65137	0.153002	-10.7931	3.71e-27	2.09e-25
SLC25A1	8836.19	-1.65103	0.162735	-10.1456	3.47e-24	1.6e-22
HDGF	31597.6	0.259938	0.177542	1.4641	0.143167	0.24463
LOC101927797	61.8207	-1.65088	0.323163	-5.10849	3.25e-07	2.24e-06
LYL1	46.5071	-1.64884	0.399719	-4.125	3.71e-05	0.000172452
NTRK1	1.91744	-0.686903	0.620076	-1.10777	0.26796	0.399619
INSRR	0.770903	0.285988	0.480485	0.595207	0.551705	NA
PEAR1	93.8973	0.0294224	0.414487	0.0709851	0.94341	0.965185
LOC101927482	14.6611	-1.6484	0.501828	-3.2848	0.00102054	0.00350473
ARHGEF11	7840.46	-0.382577	0.215845	-1.77246	0.0763181	0.147201
MIR765	3.64805	-0.412075	0.636856	-0.647046	0.517602	0.646858
ETV3L	8.44769	0.22328	0.615577	0.362716	0.716817	0.809495
ETV3	1058.41	0.181377	0.258265	0.70229	0.482498	0.615853
CYCSP52	2.02407	0.401703	0.56108	0.715947	0.474024	0.608148
APBA2	744.646	-1.64804	0.140654	-11.717	1.04e-31	7.94e-30
FCRL4	0	NA	NA	NA	NA	NA
FCRL3	0	NA	NA	NA	NA	NA
FCRL2	0	NA	NA	NA	NA	NA
FCRL1	0	NA	NA	NA	NA	NA
CD5L	0	NA	NA	NA	NA	NA
KIRREL	264.902	0.332605	0.321448	1.03471	0.300804	0.434813
LOC646268	0	NA	NA	NA	NA	NA
CD1D	13.9312	0.0333891	0.519639	0.0642544	0.948768	0.968591
CD1A	0	NA	NA	NA	NA	NA
CD1C	0	NA	NA	NA	NA	NA
CD1B	0	NA	NA	NA	NA	NA
CD1E	0	NA	NA	NA	NA	NA
OR10T2	0	NA	NA	NA	NA	NA
OR10K2	0	NA	NA	NA	NA	NA
OR10K1	0	NA	NA	NA	NA	NA
OR10R2	0	NA	NA	NA	NA	NA
OR6Y1	0	NA	NA	NA	NA	NA
OR6P1	0	NA	NA	NA	NA	NA
OR10X1	0	NA	NA	NA	NA	NA
OR10Z1	0	NA	NA	NA	NA	NA
SPTA1	0	NA	NA	NA	NA	NA
OR6K2	0	NA	NA	NA	NA	NA
OR6K3	0	NA	NA	NA	NA	NA
OR6K6	0	NA	NA	NA	NA	NA
OR6N1	0	NA	NA	NA	NA	NA
OR6N2	0	NA	NA	NA	NA	NA
MNDA	0	NA	NA	NA	NA	NA
PYHIN1	0	NA	NA	NA	NA	NA
IFI16	4.93267	-0.403252	0.628881	-0.641221	0.521379	0.650074
AIM2	0	NA	NA	NA	NA	NA
CADM3	2.23437	0.0967875	0.629086	0.153854	0.877725	0.922576
CADM3-AS1	1.02219	0.197715	0.565637	0.349544	0.726681	0.817245
ACKR1	0	NA	NA	NA	NA	NA
FCER1A	0	NA	NA	NA	NA	NA
OR10J3	0	NA	NA	NA	NA	NA
OR10J1	0	NA	NA	NA	NA	NA
OR10J5	0	NA	NA	NA	NA	NA
HTR6	7.4796	-1.64784	0.598058	-2.75531	0.00586361	0.0165122
TSPAN12	921.177	-1.64725	0.220535	-7.46931	8.06e-14	1.37e-12
NME3	1342.8	-1.64679	0.251582	-6.54572	5.92e-11	7.08e-10
FCRL6	0	NA	NA	NA	NA	NA
SLAMF8	14.8067	-0.0257857	0.526713	-0.0489559	0.960954	0.975639
C1orf204	19.5409	-0.345396	0.455031	-0.75906	0.447817	0.583658
VSIG8	3.71187	-0.463064	0.631092	-0.733751	0.4631	0.598025
CFAP45	54.9622	-0.0232029	0.355513	-0.065266	0.947962	0.968218
MIR4259	0	NA	NA	NA	NA	NA
ETFDH	1638.06	-1.64672	0.160254	-10.2757	9.07e-25	4.35e-23
IGSF9	46.0927	-0.641531	0.399647	-1.60524	0.10844	0.19644
SLAMF9	0	NA	NA	NA	NA	NA
LINC01133	0.114727	0.249609	0.305061	0.818226	0.413228	NA
PIGM	1398.3	-0.344113	0.187205	-1.83816	0.0660387	0.13096
PDE7B	684.489	-1.6453	0.214234	-7.67989	1.59e-14	2.93e-13
KCNJ9	0.671267	-0.460171	0.463385	-0.993064	0.320679	NA
NR0B2	453.503	-1.64474	0.253955	-6.47651	9.39e-11	1.08e-09
TDRD6	21.9134	-1.64376	0.507794	-3.23706	0.0012077	0.00406071
ATP1A4	1.59307	0.293985	0.600278	0.489749	0.624312	0.735869
CASQ1	1.83209	0.937566	0.604037	1.55217	0.120622	0.213787
LOC729867	963.262	0.236031	0.234531	1.0064	0.314225	0.44897
PEA15	10146.9	0.133239	0.14955	0.890933	0.372965	0.511592
RASGRF2	26.9212	-1.64256	0.442565	-3.71145	0.000206072	0.000820008
HOTS	615.111	-1.64177	0.534069	-3.07407	0.00211157	0.00668592
ZC3H12B	181.891	-1.64169	0.228917	-7.17152	7.42e-13	1.13e-11
THEMIS2	91.3169	-1.64127	0.332668	-4.93365	8.07e-07	5.2e-06
C2CD4C	154.831	-1.6411	0.326325	-5.02901	4.93e-07	3.29e-06
NHLH1	8.6382	-0.665692	0.573665	-1.16042	0.245878	0.374252
RBP7	204.904	-1.64108	0.260433	-6.30136	2.95e-10	3.21e-09
SLAMF6	0	NA	NA	NA	NA	NA
CD84	0.184016	-0.31672	0.331255	-0.956122	0.339011	NA
SLAMF1	0	NA	NA	NA	NA	NA
CD48	0	NA	NA	NA	NA	NA
SLAMF7	2.61824	0	0.602402	0	1	1
LY9	0.759311	-0.257495	0.474859	-0.542257	0.587641	NA
CD244	2.90952	-0.0560981	0.636466	-0.08814	0.929765	0.956987
ITLN1	3.43339	0.089593	0.636787	0.140696	0.88811	0.929528
LOC101928372	3.02088	-0.503418	0.636244	-0.791235	0.428807	0.565596
MFAP3L	116.954	-1.64083	0.303707	-5.40267	6.57e-08	5.06e-07
UMPS	3330.68	-1.64025	0.134234	-12.2193	2.45e-34	2.23e-32
TSTD1	14.186	-0.0802517	0.514817	-0.155884	0.876125	0.921283
USF1	3450.73	0.158468	0.119758	1.32323	0.185758	0.301509
ARHGAP30	29.39	0.535297	0.374226	1.43041	0.152599	0.257632
NRG2	9.04763	-1.64014	0.571358	-2.8706	0.00409691	0.0120638
TREX2	4.74417	-1.63746	0.620952	-2.63702	0.0083639	0.0225344
DPYD	22.194	-1.63734	0.422952	-3.87123	0.000108286	0.00045564
NIT1	3744.68	-0.0875891	0.11042	-0.793235	0.427641	0.564636
DEDD	4501.64	-0.0308892	0.119797	-0.257847	0.796525	0.866849
UFC1	7567.6	-0.0514267	0.136309	-0.37728	0.705966	0.801647
AMIGO1	190.654	-1.63727	0.258032	-6.34523	2.22e-10	2.45e-09
KANK1	5462.59	-1.63727	0.150194	-10.901	1.14e-27	6.66e-26
KCNJ12	3.44177	-1.63672	0.636396	-2.57186	0.0101153	0.0266091
FAM169A	5806.55	-1.6357	0.160148	-10.2137	1.72e-24	8.15e-23
PRDM7	3.56757	-1.63441	0.635402	-2.57224	0.0101042	0.0265867
FCER1G	33.0265	0.114123	0.409505	0.278684	0.780487	0.855813
APOA2	14336.8	0.854634	0.457218	1.86921	0.0615941	0.12361
LYPD6	2604.54	-1.63315	0.133048	-12.2749	1.23e-34	1.14e-32
MIR5187	101.765	-0.447437	0.258887	-1.72831	0.0839326	0.159161
NR1I3	481.158	-0.34838	0.204924	-1.70005	0.0891222	0.167406
PPAPDC3	262.456	-1.63308	0.177469	-9.20205	3.51e-20	1.19e-18
MPZ	681.741	0.279624	0.175312	1.595	0.110711	0.199846
PDE4B	2028.72	-1.63275	0.137653	-11.8614	1.88e-32	1.49e-30
CFAP126	216.683	-0.458005	0.273873	-1.67232	0.0944605	0.175945
FCGR2A	4.43125	-0.171823	0.632372	-0.271712	0.785844	0.859542
HSPA6	143.653	0.0710412	0.632688	0.112285	0.910598	0.94438
FCGR3A	0	NA	NA	NA	NA	NA
FCGR2C	0.690872	0.476204	0.46577	1.0224	0.306591	NA
HSPA7	17.1601	0.0792309	0.604661	0.131033	0.895749	0.93467
FCGR3B	0	NA	NA	NA	NA	NA
FCGR2B	0.154014	0.3016	0.325674	0.92608	0.354404	NA
RPL31P11	1.78637	1.11614	0.606669	1.83979	0.0657993	0.130551
PIK3CD-AS2	475.468	-1.63268	0.205556	-7.94276	1.98e-15	4.05e-14
FAM157A	77.4697	-1.63218	0.26869	-6.07458	1.24e-09	1.24e-08
DUSP12	2089.4	0.0497161	0.146895	0.338447	0.735026	0.822833
PKD2	2214.61	-1.63079	0.126007	-12.9421	2.61e-38	3.35e-36
OLFML2B	99.894	0.0149537	0.31845	0.0469578	0.962547	0.97651
TWF1	15710.1	-1.62972	0.143512	-11.356	6.93e-30	4.71e-28
MIR4654	0	NA	NA	NA	NA	NA
MIR556	0.351009	0.198684	0.384761	0.516383	0.605587	NA
C1orf111	10.8339	0.125707	0.583989	0.215255	0.829568	0.889645
MYCBP	853.844	-1.62966	0.198846	-8.19559	2.49e-16	5.72e-15
LOC101929181	6.85868	-1.62941	0.630324	-2.58503	0.00973706	0.0257502
LOC100507002	330.209	-1.62802	0.180917	-8.99871	2.28e-19	7.16e-18
UAP1	7533.02	-0.311147	0.174701	-1.78103	0.0749076	0.145056
DDR2	102.17	0.190376	0.259847	0.732648	0.463773	0.598493
HSD17B7	2681.69	-0.342888	0.212349	-1.61474	0.106367	0.193459
C1orf110	0	NA	NA	NA	NA	NA
RGS4	1.76107	-0.823273	0.605867	-1.35884	0.174199	0.286432
RGS5	52.459	0.430023	0.300139	1.43274	0.151931	0.256766
LOC101928404	0	NA	NA	NA	NA	NA
TBX2	844.386	-1.62784	0.157105	-10.3615	3.71e-25	1.84e-23
LOC100422212	0	NA	NA	NA	NA	NA
MAGEA10-MAGEA5	90.687	-1.62747	0.308981	-5.26723	1.38e-07	1.01e-06
LOC100505795	0.251442	0	0.335132	0	1	NA
LMX1A	0.260765	0	0.336166	0	1	NA
RXRG	0.377163	0	0.349988	0	1	NA
LOC400794	0	NA	NA	NA	NA	NA
LRRC52	0	NA	NA	NA	NA	NA
MGST3	3742.5	-0.152374	0.178638	-0.852979	0.393671	0.531695
ALDH9A1	8027.46	-0.183421	0.129229	-1.41935	0.155798	0.261884
NEFH	60.4602	-1.62726	0.406974	-3.99844	6.38e-05	0.000281237
APCS	344.801	-1.62715	0.22096	-7.36401	1.78e-13	2.9e-12
LOC100147773	42.7381	0.301634	0.328351	0.918633	0.358288	0.496585
UCK2	6507.15	-0.181484	0.119345	-1.52066	0.128345	0.225092
MIR3658	518.796	0.00191124	0.184088	0.0103822	0.991716	0.995913
FAM78B	1.45445	-0.705942	0.562281	-1.2555	0.209299	0.330587
MIR921	0	NA	NA	NA	NA	NA
FMO9P	0.184016	-0.31672	0.331255	-0.956122	0.339011	NA
RAB36	780.191	-1.62371	0.200116	-8.11385	4.9e-16	1.09e-14
TADA1	1757.71	-0.184425	0.130492	-1.4133	0.157568	0.264141
ILDR2	2.23862	-0.616042	0.607282	-1.01443	0.31038	0.445168
MAEL	0.512208	0	0.40793	0	1	NA
GPA33	0	NA	NA	NA	NA	NA
DUSP27	2.77677	-0.932967	0.629845	-1.48127	0.138536	0.23866
LINC01363	0	NA	NA	NA	NA	NA
POU2F1	2202.89	-0.00240761	0.239906	-0.0100356	0.991993	0.996041
H19	1107.8	-1.62275	0.507663	-3.19651	0.00139102	0.00461944
SH3PXD2A-AS1	14.6302	-1.62233	0.534632	-3.03448	0.00240953	0.00751476
RCSD1	2.58565	0.531092	0.636865	0.833915	0.404329	0.542261
F8	48.6049	-1.62228	0.326233	-4.97274	6.6e-07	4.31e-06
FOXL2	29.191	-1.62083	0.424875	-3.81485	0.000136267	0.000562103
DKK1	28.983	-1.61932	0.394926	-4.10032	4.13e-05	0.000189349
UGT2B4	1960.4	-1.61905	0.179051	-9.0424	1.53e-19	4.9e-18
MIR1255B2	0.130383	0	0.302198	0	1	NA
GPR161	2498.05	0.0807064	0.145202	0.555821	0.578333	0.698838
LAYN	3.23693	-1.6153	0.635962	-2.53993	0.0110874	0.0288203
FAIM	1235.34	-1.61519	0.181776	-8.88564	6.36e-19	1.93e-17
ANKRD36BP1	1009.73	0.242664	0.50321	0.482232	0.629641	0.740195
MAPK1	10449.6	-1.61476	0.147625	-10.9382	7.57e-28	4.48e-26
MIR557	1.01509	0	0.494752	0	1	1
LOC100505918	4.67666	-0.38983	0.628523	-0.620232	0.535105	0.662385
LOC101928565	9.30964	-0.394729	0.539623	-0.73149	0.46448	0.599185
XCL2	22.0148	0.416081	0.457107	0.910249	0.362691	0.500947
ESRRG	14.8282	-1.61435	0.49465	-3.26362	0.00109998	0.00374527
SIT1	3.40352	-1.61359	0.634276	-2.54399	0.0109596	0.0285252
LINC00626	0.209975	0.324612	0.335064	0.968806	0.332642	NA
LINC00970	0.621336	0.298293	0.414353	0.719901	0.471586	NA
LOC654342	249.043	-1.61131	0.191326	-8.42182	3.71e-17	9.31e-16
SMU1	6190.81	-1.61037	0.126778	-12.7023	5.74e-37	6.36e-35
KCNN1	403.139	-1.61031	0.18364	-8.76883	1.81e-18	5.2e-17
CCDC181	57.0475	0.439306	0.330213	1.33037	0.183397	0.298381
SNTA1	2077.69	-1.60998	0.16696	-9.64287	5.27e-22	2.06e-20
C10orf32-ASMT	10007.9	-1.60926	0.217105	-7.41234	1.24e-13	2.07e-12
SELP	0	NA	NA	NA	NA	NA
SELL	1.79622	0.340066	0.614132	0.553735	0.57976	0.699969
SELE	2.63073	0.232163	0.62302	0.372641	0.709415	0.804373
METTL18	543.212	0.0214202	0.192479	0.111286	0.91139	0.94471
CCDC69	186.976	-1.60905	0.226872	-7.09229	1.32e-12	1.94e-11
ALG1L	61.757	-1.60876	0.314264	-5.11913	3.07e-07	2.12e-06
HOXB7	69.3268	-1.60748	0.311496	-5.1605	2.46e-07	1.73e-06
METTL11B	0.720592	-0.512221	0.478271	-1.07098	0.284177	NA
MIR3119-2	0	NA	NA	NA	NA	NA
MIR3119-1	0	NA	NA	NA	NA	NA
LINC01142	0	NA	NA	NA	NA	NA
LOC101928650	6.14311	0.778914	0.621172	1.25394	0.209863	0.331126
GORAB	977.515	0.224111	0.14084	1.59124	0.111556	0.201097
PRRX1	0	NA	NA	NA	NA	NA
MROH9	0	NA	NA	NA	NA	NA
FMO3	3.87971	-0.640187	0.631507	-1.01375	0.310704	0.445505
MIR1295A	0	NA	NA	NA	NA	NA
MIR1295B	0	NA	NA	NA	NA	NA
FMO6P	0	NA	NA	NA	NA	NA
FMO2	0	NA	NA	NA	NA	NA
FMO1	0.19456	-0.320819	0.33292	-0.963655	0.335219	NA
FMO4	5.39252	-0.457841	0.594914	-0.769592	0.441542	0.577899
TOP1P1	43.6182	0.0614675	0.341595	0.179943	0.857198	0.908311
FAM86FP	121.48	-1.60731	0.232927	-6.9005	5.18e-12	7.05e-11
MYOC	0.791237	-0.281243	0.478505	-0.587754	0.556698	NA
VAMP4	738.309	-0.220375	0.162652	-1.35489	0.175453	0.28805
METTL13	5523.01	0.24463	0.132096	1.85192	0.0640379	0.127704
DNM3	4.29537	0.16238	0.621815	0.261139	0.793985	0.865132
DNM3-IT1	0	NA	NA	NA	NA	NA
DNM3OS	0.672487	-0.467983	0.463718	-1.0092	0.31288	NA
MIR214	0	NA	NA	NA	NA	NA
MIR3120	0	NA	NA	NA	NA	NA
MIR199A2	0.226486	-0.33193	0.337325	-0.984004	0.325113	NA
C1orf105	41.2057	0.6459	0.355255	1.81813	0.0690439	0.135933
LOC101927045	57.9354	-1.60604	0.302012	-5.31781	1.05e-07	7.83e-07
USP2-AS1	46.0067	-1.60559	0.373732	-4.29611	1.74e-05	8.72e-05
FASLG	0.80877	0.180492	0.498471	0.362092	0.717283	NA
TNFSF18	0	NA	NA	NA	NA	NA
TNFSF4	53.7181	0.37132	0.348016	1.06696	0.285989	0.418934
BRD3	2333.38	-1.60443	0.158827	-10.1017	5.43e-24	2.47e-22
LOC101928673	106.883	0.289371	0.242375	1.1939	0.232518	0.358157
DPH3P1	128.15	-1.60404	0.224942	-7.13092	9.97e-13	1.49e-11
SLC9C2	0.446002	-0.201529	0.374493	-0.538137	0.590483	NA
TNFRSF8	55.4437	-1.60332	0.394903	-4.06003	4.91e-05	0.000221968
LOC730159	0	NA	NA	NA	NA	NA
KLHL20	1398.89	-0.117494	0.144627	-0.812391	0.416567	0.553906
CENPL	1615.2	0.0697337	0.138345	0.504056	0.614222	0.728142
GNB3	93.1915	-1.60266	0.38106	-4.20581	2.6e-05	0.000125674
GAS5-AS1	341.21	0.482252	0.251601	1.91673	0.0552719	0.113061
CHTF18	4742.5	-1.60191	0.217052	-7.38033	1.58e-13	2.59e-12
SNORD81	118.141	0.236479	0.298902	0.79116	0.42885	0.565596
SNORD47	270.734	0.228124	0.266479	0.856067	0.391961	0.529845
SNORD80	288.504	-0.0531852	0.220795	-0.24088	0.809648	0.875728
SNORD79	230.634	0.445228	0.235573	1.88998	0.0587612	0.118955
SNORD78	83.8153	0.439795	0.348783	1.26094	0.20733	0.328133
SNORD44	237.675	0.353721	0.238816	1.48115	0.138567	0.238693
SNORD77	69.9127	0.313253	0.321529	0.974262	0.329926	0.466316
TSPY26P	9.39954	-1.6007	0.589092	-2.71722	0.0065832	0.0182549
SNORD75	47.518	0.726127	0.418734	1.7341	0.0828997	0.157608
SNORD74	89.0562	0.536155	0.289616	1.85126	0.0641318	0.127802
ZBTB37	192.742	0.338505	0.345602	0.979465	0.32735	0.463537
SERPINC1	33.0943	0.740897	0.441633	1.67763	0.093419	0.174428
[truncated: 24,366 more rows]
